# Supplementary material for: Insights into electric- and thermal-induced decomposition and gas evolution of silicone rubber through experiments and molecular simulations
Source: Royal Society of Chemistry journal article supplement (doi:10.1039/d5ra07405c), 2025-01-01
Supplement: d5ra07405c1.xlsx [file d5ra07405c1.xlsx]

## Sheet: C2H2
Wave number (cm-1)	C2H2 Absorbance
500	0
506	0
512	0
518	0
524	0
530	0
536	0
542	0
548	0
554	0
560	0
566	0
572	0
578	0
584	0
590	0
596	0
602	0.351498
608	0.379858
614	0.411794
620	0.447933
626	0.489044
632	0.536084
638	0.59025
644	0.653057
650	0.726444
656	0.812926
662	0.915814
668	1.03953
674	1.19011
680	1.3759
686	1.6088
692	1.90619
698	2.29421
704	2.81374
710	3.53154
716	4.56262
722	6.11893
728	8.62606
734	13.0423
740	21.8985
746	43.664
752	119.267
758	473.38
764	244.747
770	69.907
776	30.5166
782	16.8127
788	10.5894
794	7.26559
800	5.28873
806	4.01973
812	3.15746
818	2.54522
824	2.09502
830	1.7544
836	1.4905
842	1.28192
848	1.11422
854	0.977379
860	0.86427
866	0.769709
872	0.689853
878	0.621805
884	0.563347
890	0.512759
896	0.46869
902	0.430065
908	0.396025
914	0.365871
920	0
926	0
932	0
938	0
944	0
950	0
956	0
962	0
968	0
974	0
980	0
986	0
992	0
998	0
1004	0
1010	0
1016	0
1022	0
1028	0
1034	0
1040	0
1046	0
1052	0
1058	0
1064	0
1070	0
1076	0
1082	0
1088	0
1094	0
1100	0
1106	0
1112	0
1118	0
1124	0
1130	0
1136	0
1142	0
1148	0
1154	0
1160	0
1166	0
1172	0
1178	0
1184	0
1190	0
1196	0
1202	0
1208	0
1214	0
1220	0
1226	0
1232	0
1238	0
1244	0
1250	0
1256	0
1262	0
1268	0
1274	0
1280	0
1286	0
1292	0
1298	0
1304	0
1310	0
1316	0
1322	0
1328	0
1334	0
1340	0
1346	0
1352	0
1358	0
1364	0
1370	0
1376	0
1382	0
1388	0
1394	0
1400	0
1406	0
1412	0
1418	0
1424	0
1430	0
1436	0
1442	0
1448	0
1454	0
1460	0
1466	0
1472	0
1478	0
1484	0
1490	0
1496	0
1502	0
1508	0
1514	0
1520	0
1526	0
1532	0
1538	0
1544	0
1550	0
1556	0
1562	0
1568	0
1574	0
1580	0
1586	0
1592	0
1598	0
1604	0
1610	0
1616	0
1622	0
1628	0
1634	0
1640	0
1646	0
1652	0
1658	0
1664	0
1670	0
1676	0
1682	0
1688	0
1694	0
1700	0
1706	0
1712	0
1718	0
1724	0
1730	0
1736	0
1742	0
1748	0
1754	0
1760	0
1766	0
1772	0
1778	0
1784	0
1790	0
1796	0
1802	0
1808	0
1814	0
1820	0
1826	0
1832	0
1838	0
1844	0
1850	0
1856	0
1862	0
1868	0
1874	0
1880	0
1886	0
1892	0
1898	0
1904	0
1910	0
1916	0
1922	0
1928	0
1934	0
1940	0
1946	0
1952	0
1958	0
1964	0
1970	0
1976	0
1982	0
1988	0
1994	0
2000	0
2006	0
2012	0
2018	0
2024	0
2030	0
2036	0
2042	0
2048	0
2054	0
2060	0
2066	0
2072	0
2078	0
2084	0
2090	0
2096	0
2102	0
2108	0
2114	0
2120	0
2126	0
2132	0
2138	0
2144	0
2150	0
2156	0
2162	0
2168	0
2174	0
2180	0
2186	0
2192	0
2198	0
2204	0
2210	0
2216	0
2222	0
2228	0
2234	0
2240	0
2246	0
2252	0
2258	0
2264	0
2270	0
2276	0
2282	0
2288	0
2294	0
2300	0
2306	0
2312	0
2318	0
2324	0
2330	0
2336	0
2342	0
2348	0
2354	0
2360	0
2366	0
2372	0
2378	0
2384	0
2390	0
2396	0
2402	0
2408	0
2414	0
2420	0
2426	0
2432	0
2438	0
2444	0
2450	0
2456	0
2462	0
2468	0
2474	0
2480	0
2486	0
2492	0
2498	0
2504	0
2510	0
2516	0
2522	0
2528	0
2534	0
2540	0
2546	0
2552	0
2558	0
2564	0
2570	0
2576	0
2582	0
2588	0
2594	0
2600	0
2606	0
2612	0
2618	0
2624	0
2630	0
2636	0
2642	0
2648	0
2654	0
2660	0
2666	0
2672	0
2678	0
2684	0
2690	0
2696	0
2702	0
2708	0
2714	0
2720	0
2726	0
2732	0
2738	0
2744	0
2750	0
2756	0
2762	0
2768	0
2774	0
2780	0
2786	0
2792	0
2798	0
2804	0
2810	0
2816	0
2822	0
2828	0
2834	0
2840	0
2846	0
2852	0
2858	0
2864	0
2870	0
2876	0
2882	0
2888	0
2894	0
2900	0
2906	0
2912	0
2918	0
2924	0
2930	0
2936	0
2942	0
2948	0
2954	0
2960	0
2966	0
2972	0
2978	0
2984	0
2990	0
2996	0
3002	0
3008	0
3014	0
3020	0
3026	0
3032	0
3038	0
3044	0
3050	0
3056	0
3062	0
3068	0
3074	0
3080	0
3086	0
3092	0
3098	0
3104	0
3110	0
3116	0
3122	0
3128	0
3134	0
3140	0
3146	0
3152	0
3158	0
3164	0
3170	0
3176	0.215252
3182	0.232773
3188	0.252523
3194	0.274897
3200	0.30038
3206	0.329578
3212	0.363247
3218	0.402349
3224	0.44812
3230	0.502164
3236	0.566604
3242	0.644283
3248	0.73909
3254	0.856453
3260	1.00413
3266	1.19352
3272	1.44192
3278	1.77661
3284	2.24261
3290	2.91853
3296	3.95167
3302	5.64442
3308	8.69832
3314	15.0483
3320	31.6149
3326	95.2555
3332	327.31
3338	107.504
3344	34.2015
3350	15.9072
3356	9.07602
3362	5.8416
3368	4.06701
3374	2.99163
3380	2.29179
3386	1.81125
3392	1.46723
3398	1.21256
3404	1.01881
3410	0.868012
3416	0.748351
3422	0.651817
3428	0.572815
3434	0.507345
3440	0.452485
3446	0.406062
3452	0.366431
3458	0.332329
3464	0.302773
3470	0.276992
3476	0.254367
3482	0.234405
3488	0.216703
3494	0

## Sheet: C2H4
Wave number (cm-1)	C2H4 Absorbance
500	0
506	0
512	0
518	0
524	0
530	0
536	0
542	0
548	0
554	0
560	0
566	0
572	0
578	0
584	0
590	0
596	0
602	0
608	0
614	0
620	0
626	0
632	0
638	0.00157169
644	0.00169819
650	0.00184059
656	0.00200167
662	0.00218486
668	0.00239439
674	0.00263556
680	0.00291507
686	0.0032415
692	0.00362598
698	0.00408309
704	0.00463238
710	0.00530034
716	0.0061238
722	0.00715497
728	0.00847
734	0.0101833
740	0.0124733
746	0.0156303
752	0.020153
758	0.0269557
764	0.0378636
770	0.0569521
776	0.271976
782	0.377929
788	0.703849
794	2.21096
800	1.45369
806	0.604572
812	0.440313
818	0.40669
824	0.414313
830	0.442229
836	0.484675
842	0.540836
848	0.612299
854	0.702498
860	0.816936
866	0.963993
872	1.15648
878	1.41454
884	1.77104
890	2.28259
896	3.05313
902	4.29052
908	6.4599
914	10.7791
920	21.2688
926	56.9665
932	227.642
938	132.685
944	37.0574
950	15.9399
956	8.71055
962	5.45939
968	3.73352
974	2.71133
980	2.05716
986	1.61369
992	1.29939
998	1.06861
1004	0.894211
1010	0.759233
1016	0.65264
1022	0.567001
1028	0.497167
1034	0.439477
1040	0.391271
1046	0.350579
1052	0.315918
1058	0.286152
1064	0.260403
1070	0.237977
1076	0.218328
1082	0.201015
1088	0.185683
1094	0
1100	0
1106	0
1112	0
1118	0
1124	0
1130	0
1136	0
1142	0
1148	0
1154	0
1160	0
1166	0
1172	0
1178	0
1184	0
1190	0
1196	0
1202	0
1208	0
1214	0
1220	0
1226	0
1232	0
1238	0.0140632
1244	0.0151912
1250	0.0164606
1256	0.017896
1262	0.0195276
1268	0.0213928
1274	0.0235385
1280	0.0260238
1286	0.0289245
1292	0.0323382
1298	0.0363937
1304	0.0412623
1310	0.0471765
1316	0.0544586
1322	0.0635649
1328	0.0751588
1334	0.090235
1340	0.110339
1346	0.137976
1352	0.177427
1358	0.236496
1364	0.330634
1370	0.493974
1376	0.814254
1382	1.57319
1388	4.04857
1394	16.0866
1400	12.3242
1406	3.2902
1412	1.36885
1418	0.734776
1424	0.455541
1430	0.309287
1436	0.223458
1442	0.168897
1448	0.132096
1454	0.106117
1460	0.0871027
1466	0.0727715
1472	0.0617041
1478	0.0529803
1484	0.0459827
1490	0.0402844
1496	0.0355827
1502	0.0316583
1508	0.0283487
1514	0.0255321
1520	0.0231151
1526	0.0210257
1532	0.0192073
1538	0.0176148
1544	0.0162125
1550	0.0149711
1556	0.0138671
1562	0
1568	0
1574	0
1580	0
1586	0
1592	0
1598	0
1604	0
1610	0
1616	0
1622	0
1628	0
1634	0
1640	0
1646	0
1652	0
1658	0
1664	0
1670	0
1676	0
1682	0
1688	0
1694	0
1700	0
1706	0
1712	0
1718	0
1724	0
1730	0
1736	0
1742	0
1748	0
1754	0
1760	0
1766	0
1772	0
1778	0
1784	0
1790	0
1796	0
1802	0
1808	0
1814	0
1820	0
1826	0
1832	0
1838	0
1844	0
1850	0
1856	0
1862	0
1868	0
1874	0
1880	0
1886	0
1892	0
1898	0
1904	0
1910	0
1916	0
1922	0
1928	0
1934	0
1940	0
1946	0
1952	0
1958	0
1964	0
1970	0
1976	0
1982	0
1988	0
1994	0
2000	0
2006	0
2012	0
2018	0
2024	0
2030	0
2036	0
2042	0
2048	0
2054	0
2060	0
2066	0
2072	0
2078	0
2084	0
2090	0
2096	0
2102	0
2108	0
2114	0
2120	0
2126	0
2132	0
2138	0
2144	0
2150	0
2156	0
2162	0
2168	0
2174	0
2180	0
2186	0
2192	0
2198	0
2204	0
2210	0
2216	0
2222	0
2228	0
2234	0
2240	0
2246	0
2252	0
2258	0
2264	0
2270	0
2276	0
2282	0
2288	0
2294	0
2300	0
2306	0
2312	0
2318	0
2324	0
2330	0
2336	0
2342	0
2348	0
2354	0
2360	0
2366	0
2372	0
2378	0
2384	0
2390	0
2396	0
2402	0
2408	0
2414	0
2420	0
2426	0
2432	0
2438	0
2444	0
2450	0
2456	0
2462	0
2468	0
2474	0
2480	0
2486	0
2492	0
2498	0
2504	0
2510	0
2516	0
2522	0
2528	0
2534	0
2540	0
2546	0
2552	0
2558	0
2564	0
2570	0
2576	0
2582	0
2588	0
2594	0
2600	0
2606	0
2612	0
2618	0
2624	0
2630	0
2636	0
2642	0
2648	0
2654	0
2660	0
2666	0
2672	0
2678	0
2684	0
2690	0
2696	0
2702	0
2708	0
2714	0
2720	0
2726	0
2732	0
2738	0
2744	0
2750	0
2756	0
2762	0
2768	0
2774	0
2780	0
2786	0
2792	0
2798	0
2804	0
2810	0
2816	0
2822	0
2828	0
2834	0
2840	0
2846	0
2852	0
2858	0
2864	0.0292643
2870	0.0316435
2876	0.034325
2882	0.0373624
2888	0.0408213
2894	0.0447836
2900	0.0493518
2906	0.0546561
2912	0.0608635
2918	0.068191
2924	0.0769253
2930	0.0874505
2936	0.100292
2942	0.116181
2948	0.136164
2954	0.161776
2960	0.195345
2966	0.240537
2972	0.344497
2978	0.438931
2984	0.58168
2990	0.813111
2996	1.22641
3002	2.07688
3008	4.269
3014	12.5568
3020	44.3494
3026	15.3592
3032	4.89624
3038	2.33362
3044	1.39841
3050	0.97249
3056	0.756415
3062	0.646088
3068	0.600061
3074	0.602489
3080	0.651721
3086	0.758727
3092	0.953153
3098	1.30368
3104	1.98124
3110	3.49242
3116	7.84505
3122	27.0997
3128	53.9447
3134	13.6712
3140	5.00909
3146	2.52567
3152	1.51621
3158	1.01229
3164	0.725489
3170	0.546806
3176	0.427892
3182	0.317245
3188	0.258603
3194	0.214821
3200	0.181275
3206	0.155009
3212	0.134061
3218	0.117086
3224	0.103141
3230	0.0915459
3236	0.0818006
3242	0.0735319
3248	0.066456
3254	0.0603541
3260	0.0550553
3266	0.0504248
3272	0.0463546
3278	0.042758
3284	0.0395642
3290	0
3296	0
3302	0
3308	0
3314	0
3320	0
3326	0
3332	0
3338	0
3344	0
3350	0
3356	0
3362	0
3368	0
3374	0
3380	0
3386	0
3392	0
3398	0
3404	0
3410	0
3416	0
3422	0
3428	0
3434	0
3440	0
3446	0
3452	0
3458	0
3464	0
3470	0
3476	0
3482	0
3488	0
3494	0

## Sheet: C6H6
Wave number (cm-1)	C6H6 Absorbance
0	0
7	0
14	0
21	0
28	0
35	0
42	0
49	0
56	0
63	0
70	0
77	0
84	0
91	0
98	0
105	0
112	0
119	0
126	0
133	0
140	0
147	0
154	0
161	0
168	0
175	0
182	0
189	0
196	0
203	0
210	0
217	0
224	0
231	0
238	0
245	0
252	0
259	0
266	0
273	0
280	0
287	0
294	0
301	0
308	0
315	0
322	0
329	0
336	0
343	0
350	0
357	0
364	0
371	0
378	0
385	0
392	0
399	0
406	0
413	0
420	0
427	0
434	0
441	0
448	0
455	0
462	0
469	0
476	0
483	0
490	0
497	0
504	0
511	0
518	0.184791
525	0.202867
532	0.223732
539	0.247987
546	0.27641
553	0.310013
560	0.350135
567	0.398578
574	0.457809
581	0.531286
588	0.623968
595	0.743173
602	0.900065
609	1.11236
616	1.40951
623	1.84347
630	2.51282
637	3.62353
644	5.66563
651	10.0457
658	22.1729
665	75.9373
672	266.615
679	59.3613
686	19.0641
693	9.04351
700	5.2298
707	3.3972
714	2.38083
721	1.75995
728	1.35339
735	1.07286
742	0.87123
749	0.721484
756	0.607248
763	0.518127
770	0.447268
777	0.390004
784	0.343068
791	0.304119
798	0.271444
805	0.243763
812	0.22011
819	0.199738
826	0.182069
833	0
840	0
847	0
854	0
861	0
868	0.020709
875	0.0227157
882	0.0250289
889	0.0277141
896	0.0308557
903	0.0345632
910	0.0389811
917	0.044303
924	0.0507934
931	0.058821
938	0.068912
945	0.0818386
952	0.0987707
959	0.121549
966	0.153205
973	0.199019
980	0.268856
987	0.382896
994	0.587798
1001	1.0119
1008	2.11595
1015	6.479
1022	29.8754
1029	9.09235
1036	2.605
1043	1.16938
1050	0.656247
1057	0.418434
1064	0.289579
1071	0.212129
1078	0.162014
1085	0.127749
1092	0.103297
1099	0.0852429
1106	0.0715363
1113	0.0608864
1120	0.0524479
1127	0.0456487
1134	0.0400903
1141	0.0354883
1148	0.0316352
1155	0.028377
1162	0.0255973
1169	0.0232068
1176	0.0211361
1183	0
1190	0
1197	0
1204	0
1211	0
1218	0
1225	0
1232	0
1239	0
1246	0
1253	0
1260	0
1267	0
1274	0
1281	0
1288	0
1295	0
1302	0.0316422
1309	0.0346563
1316	0.0381224
1323	0.0421356
1330	0.0468172
1337	0.0523245
1344	0.0588636
1351	0.066709
1358	0.0762332
1365	0.0879514
1372	0.102593
1379	0.121215
1386	0.145404
1393	0.177618
1400	0.221834
1407	0.284836
1414	0.378957
1421	0.528554
1428	0.787282
1435	1.29276
1442	2.48759
1449	6.42839
1456	29.2128
1463	26.3081
1470	5.99166
1477	2.3759
1484	1.25
1491	0.766748
1498	0.517189
1505	0.37203
1512	0.280309
1519	0.218716
1526	0.175381
1533	0.143745
1540	0.119951
1547	0.101608
1554	0.087169
1561	0.0756015
1568	0.0661916
1575	0.0584346
1582	0.0519648
1589	0.0465127
1596	0.0418755
1603	0.0378985
1610	0.0344622
1617	0.0314728
1624	0
1631	0
1638	0
1645	0
1652	0
1659	0
1666	0
1673	0
1680	0
1687	0
1694	0
1701	0
1708	0
1715	0
1722	0
1729	0
1736	0
1743	0
1750	0
1757	0
1764	0
1771	0
1778	0
1785	0
1792	0
1799	0
1806	0
1813	0
1820	0
1827	0
1834	0
1841	0
1848	0
1855	0
1862	0
1869	0
1876	0
1883	0
1890	0
1897	0
1904	0
1911	0
1918	0
1925	0
1932	0
1939	0
1946	0
1953	0
1960	0
1967	0
1974	0
1981	0
1988	0
1995	0
2002	0
2009	0
2016	0
2023	0
2030	0
2037	0
2044	0
2051	0
2058	0
2065	0
2072	0
2079	0
2086	0
2093	0
2100	0
2107	0
2114	0
2121	0
2128	0
2135	0
2142	0
2149	0
2156	0
2163	0
2170	0
2177	0
2184	0
2191	0
2198	0
2205	0
2212	0
2219	0
2226	0
2233	0
2240	0
2247	0
2254	0
2261	0
2268	0
2275	0
2282	0
2289	0
2296	0
2303	0
2310	0
2317	0
2324	0
2331	0
2338	0
2345	0
2352	0
2359	0
2366	0
2373	0
2380	0
2387	0
2394	0
2401	0
2408	0
2415	0
2422	0
2429	0
2436	0
2443	0
2450	0
2457	0
2464	0
2471	0
2478	0
2485	0
2492	0
2499	0
2506	0
2513	0
2520	0
2527	0
2534	0
2541	0
2548	0
2555	0
2562	0
2569	0
2576	0
2583	0
2590	0
2597	0
2604	0
2611	0
2618	0
2625	0
2632	0
2639	0
2646	0
2653	0
2660	0
2667	0
2674	0
2681	0
2688	0
2695	0
2702	0
2709	0
2716	0
2723	0
2730	0
2737	0
2744	0
2751	0
2758	0
2765	0
2772	0
2779	0
2786	0
2793	0
2800	0
2807	0
2814	0
2821	0
2828	0
2835	0
2842	0
2849	0
2856	0
2863	0
2870	0
2877	0
2884	0
2891	0
2898	0
2905	4.271e-07
2912	4.675e-07
2919	9.666e-07
2926	1.0645e-06
2933	0.141345
2940	0.155154
2947	0.171088
2954	0.189608
2961	0.211306
2968	0.236951
2975	0.267562
2982	0.30451
2989	0.349669
2996	0.405665
3003	0.476262
3010	0.567009
3017	0.686363
3024	0.847724
3031	1.07335
3038	1.40242
3045	1.90913
3052	2.74797
3059	4.28516
3066	7.56446
3073	16.5594
3080	55.7603
3087	206.773
3094	47.4051
3101	14.9897
3108	7.05766
3115	4.06461
3122	2.63351
3129	1.84239
3136	1.3602
3143	1.04498
3150	0.827755
3157	0.671783
3164	0.556043
3171	0.467808
3178	0.399012
3185	0.344339
3192	0.300174
3199	0.263989
3206	0.233971
3213	0.208795
3220	0.187473
3227	0.169256
3234	0.153571
3241	0.139969
3248	6.901e-07
3255	6.308e-07
3262	0
3269	0
3276	0
3283	0
3290	0
3297	0
3304	0
3311	0
3318	0
3325	0
3332	0
3339	0
3346	0
3353	0
3360	0
3367	0
3374	0
3381	0
3388	0
3395	0
3402	0
3409	0
3416	0
3423	0
3430	0
3437	0
3444	0
3451	0
3458	0
3465	0
3472	0
3479	0
3486	0
3493	0

## Sheet: CH2O
Wave number (cm-1)	CH2O Absorbance
1000	0.00279406
1004	0.00294434
1008	0.00310707
1012	0.00328367
1016	0.00347576
1020	0.00368521
1024	0.00391418
1028	0.00416515
1032	0.00444105
1036	0.0047453
1040	0.0050819
1044	0.0054556
1048	0.00587208
1052	0.00633811
1056	0.00686187
1060	0.00745329
1064	0.0364629
1068	0.0387001
1072	0.0411684
1076	0.0439044
1080	0.0469527
1084	0.050369
1088	0.0542231
1092	0.0586047
1096	0.0636302
1100	0.0694543
1104	0.0762876
1108	0.0844241
1112	0.0942873
1116	0.10651
1120	0.122078
1124	0.142611
1128	0.170933
1132	0.212372
1136	0.277997
1140	0.393906
1144	0.632904
1148	1.24479
1152	3.06882
1156	3.88414
1160	1.66041
1164	0.842485
1168	0.572633
1172	0.476873
1176	0.454139
1180	0.473177
1184	0.525345
1188	0.612627
1192	0.745607
1196	0.946571
1200	1.25924
1204	1.77367
1208	2.69493
1212	4.56342
1216	9.10865
1220	22.7544
1224	45.3776
1228	22.6378
1232	9.06582
1236	4.53968
1240	2.67448
1244	1.75144
1248	1.23271
1252	0.913682
1256	0.703971
1260	0.558926
1264	0.454505
1268	0.376861
1272	0.317571
1276	0.271276
1280	0.234439
1284	0.204648
1288	0.180212
1292	0.15992
1296	0.142884
1300	0.128442
1304	0.116092
1308	0.105448
1312	0.0962093
1316	0.085574
1320	0.0786042
1324	0.0864341
1328	0.0817215
1332	0.0776639
1336	0.0741851
1340	0.0712239
1344	0.0687316
1348	0.0666699
1352	0.0650097
1356	0.0637301
1360	0.0628174
1364	0.0622653
1368	0.0620742
1372	0.0622521
1376	0.0628144
1380	0.0637854
1384	0.0368683
1388	0.0401361
1392	0.0438581
1396	0.0481225
1400	0.05304
1404	0.0587508
1408	0.0654351
1412	0.0733272
1416	0.082736
1420	0.094076
1424	0.107913
1428	0.125038
1432	0.146575
1436	0.174179
1440	0.210353
1444	0.259031
1448	0.32668
1452	0.424524
1456	0.573396
1460	0.815437
1464	1.24594
1468	2.11504
1472	4.22063
1476	10.5278
1480	21.2901
1484	10.7663
1488	4.29696
1492	2.14366
1496	1.25915
1500	0.822494
1504	0.577578
1508	0.427195
1512	0.328487
1516	0.260308
1520	0.211288
1524	0.174884
1528	0.14712
1532	0.125467
1536	0.108258
1540	0.0943562
1544	0.0829671
1548	0.07352
1552	0.0655977
1556	0.0588892
1560	0.0531587
1564	0.0482251
1568	0.0439474
1572	0.0402142
1576	0.036937
1580	0.0340445
1584	0.0314788
1588	0.0291924
1592	0.0271463
1596	0.0253079
1600	0.0236501
1604	0.0221499
1608	0.020788
1612	0.0195479
1616	0.0184156
1620	0.0173788
1624	0.0164272
1628	0.0155516
1632	0.0147442
1636	0.0139981
1640	0.0133071
1644	0.23997
1648	0.252631
1652	0.266321
1656	0.281155
1660	0.297263
1664	0.314796
1668	0.333926
1672	0.354854
1676	0.377812
1680	0.403072
1684	0.430951
1688	0.461825
1692	0.496138
1696	0.53442
1700	0.577307
1704	0.625569
1708	0.680142
1712	0.742175
1716	0.813092
1720	0.894672
1724	0.989163
1728	1.09944
1732	1.22921
1736	1.38337
1740	1.5684
1744	1.79314
1748	2.06978
1752	2.41558
1756	2.85562
1760	3.42739
1764	4.18901
1768	5.23436
1772	6.72298
1776	8.94342
1780	12.4599
1784	18.4935
1788	30.065
1792	56.1102
1796	128.941
1800	326.644
1804	267.383
1808	102.134
1812	47.1372
1816	26.3083
1820	16.6169
1824	11.3998
1828	8.28948
1832	6.29243
1836	4.93632
1840	3.97438
1844	3.2678
1848	2.73379
1852	2.3205
1856	1.99416
1860	1.73203
1864	1.51832
1868	1.34181
1872	1.19435
1876	1.06991
1880	0.963932
1884	0.872945
1888	0.79425
1892	0.725729
1896	0.665703
1900	0.612823
1904	0.566
1908	0.524343
1912	0.487119
1916	0.453721
1920	0.423643
1924	0.396458
1928	0.371808
1932	0.349386
1936	0.328933
1940	0.310224
1944	0.293066
1948	0.277293
1952	0.26276
1956	0.24934
1960	0.236922
1964	0
1968	0
1972	0
1976	0
1980	0
1984	0
1988	0
1992	0
1996	0
2000	0
2004	0
2008	0
2012	0
2016	0
2020	0
2024	0
2028	0
2032	0
2036	0
2040	0
2044	0
2048	0
2052	0
2056	0
2060	0
2064	0
2068	0
2072	0
2076	0
2080	0
2084	0
2088	0
2092	0
2096	0
2100	0
2104	0
2108	0
2112	0
2116	0
2120	0
2124	0
2128	0
2132	0
2136	0
2140	0
2144	0
2148	0
2152	0
2156	0
2160	0
2164	0
2168	0
2172	0
2176	0
2180	0
2184	0
2188	0
2192	0
2196	0
2200	0
2204	0
2208	0
2212	0
2216	0
2220	0
2224	0
2228	0
2232	0
2236	0
2240	0
2244	0
2248	0
2252	0
2256	0
2260	0
2264	0
2268	0
2272	0
2276	0
2280	0
2284	0
2288	0
2292	0
2296	0
2300	0
2304	0
2308	0
2312	0
2316	0
2320	0
2324	0
2328	0
2332	0
2336	0
2340	0
2344	0
2348	0
2352	0
2356	0
2360	0
2364	0
2368	0
2372	0
2376	0
2380	0
2384	0
2388	0
2392	0
2396	0
2400	0
2404	0
2408	0
2412	0
2416	0
2420	0
2424	0
2428	0
2432	0
2436	0
2440	0
2444	0
2448	0
2452	0
2456	0
2460	0
2464	0
2468	0
2472	0
2476	0
2480	0
2484	0
2488	0
2492	0
2496	0
2500	0
2504	0
2508	0
2512	0
2516	0
2520	0
2524	0
2528	0
2532	0
2536	0
2540	0
2544	0
2548	0
2552	0
2556	0
2560	0
2564	0
2568	0
2572	0
2576	0
2580	0
2584	0
2588	0
2592	0
2596	0
2600	0
2604	0
2608	0
2612	0.127085
2616	0.133707
2620	0.140859
2624	0.148602
2628	0.157
2632	0.166131
2636	0.176082
2640	0.186955
2644	0.198866
2648	0.211952
2652	0.226373
2656	0.242317
2660	0.260006
2664	0.279705
2668	0.301728
2672	0.682849
2676	0.729651
2680	0.78173
2684	0.839956
2688	0.905392
2692	0.979355
2696	1.06349
2700	1.15988
2704	1.27119
2708	1.40091
2712	1.55364
2716	1.73561
2720	1.95539
2724	2.22514
2728	2.56251
2732	2.99414
2736	3.56168
2740	4.33357
2744	5.4288
2748	7.06961
2752	9.71044
2756	14.3969
2760	23.9445
2764	47.629
2768	119.244
2772	200.43
2776	90.3843
2780	39.6824
2784	22.877
2788	16.3397
2792	13.7776
2796	13.2837
2800	14.3178
2804	17.0016
2808	22.1157
2812	31.6932
2816	51.1241
2820	97.1762
2824	232.052
2828	532.739
2832	324.989
2836	126.634
2840	61.4373
2844	35.5395
2848	23.0438
2852	16.137
2856	11.9355
2860	9.19351
2864	7.30591
2868	5.95091
2872	4.94499
2876	4.17735
2880	3.57793
2884	3.10067
2888	2.71431
2892	2.39698
2896	2.13306
2900	1.91111
2904	1.7226
2908	1.56109
2912	1.42162
2916	1.30031
2920	1.19411
2924	1.1006
2928	1.01781
2932	0.818919
2936	0.759094
2940	0.70559
2944	0.657548
2948	0.614249
2952	0.575088
2956	0.539555
2960	0.507216
2964	0.477698
2968	0.450684
2972	0.425897
2976	0.4031
2980	0.382085
2984	0.362671
2988	0.3447
2992	0
2996	0

## Sheet: CH4
Wave number (cm-1)	CH4 Absorbance
1200	0.31464
1204	0.347115
1208	0.384885
1212	0.429166
1216	0.481542
1220	0.544111
1224	0.619696
1228	0.712167
1232	0.826944
1236	0.971803
1240	1.15822
1244	1.40369
1248	1.73592
1252	2.20094
1256	2.87955
1260	3.92408
1264	5.64862
1268	8.78208
1272	15.3049
1276	31.8017
1280	82.0506
1284	132.158
1288	56.8759
1292	23.6777
1296	12.2666
1300	7.38299
1304	4.90179
1308	3.48184
1312	2.59715
1316	2.01002
1320	1.60099
1324	1.30488
1328	1.08374
1332	0.914286
1336	0.781616
1340	0.675818
1344	0.590105
1348	0.519704
1352	0.461176
1356	0.411997
1360	0.370278
1364	0.334585
1368	0.303811
1372	0.277093
1376	0.253748
1380	0.233233
1384	0.215107
1388	0.199014
1392	0.184661
1396	0.171806
1400	0.160247
1404	0.149816
1408	0.140372
1412	0.131793
1416	0.123976
1420	0.116835
1424	0.110293
1428	0.104286
1432	0.0987563
1436	0.0936549
1440	0.0889388
1444	0
1448	0
1452	0
1456	0
1460	0
1464	0
1468	0
1472	0
1476	0
1480	0
1484	0
1488	0
1492	0
1496	0
1500	0
1504	0
1508	0
1512	0
1516	0
1520	0
1524	0
1528	0
1532	0
1536	0
1540	0
1544	0
1548	0
1552	0
1556	0
1560	0
1564	0
1568	0
1572	0
1576	0
1580	0
1584	0
1588	0
1592	0
1596	0
1600	0
1604	0
1608	0
1612	0
1616	0
1620	0
1624	0
1628	0
1632	0
1636	0
1640	0
1644	0
1648	0
1652	0
1656	0
1660	0
1664	0
1668	0
1672	0
1676	0
1680	0
1684	0
1688	0
1692	0
1696	0
1700	0
1704	0
1708	0
1712	0
1716	0
1720	0
1724	0
1728	0
1732	0
1736	0
1740	0
1744	0
1748	0
1752	0
1756	0
1760	0
1764	0
1768	0
1772	0
1776	0
1780	0
1784	0
1788	0
1792	0
1796	0
1800	0
1804	0
1808	0
1812	0
1816	0
1820	0
1824	0
1828	0
1832	0
1836	0
1840	0
1844	0
1848	0
1852	0
1856	0
1860	0
1864	0
1868	0
1872	0
1876	0
1880	0
1884	0
1888	0
1892	0
1896	0
1900	0
1904	0
1908	0
1912	0
1916	0
1920	0
1924	0
1928	0
1932	0
1936	0
1940	0
1944	0
1948	0
1952	0
1956	0
1960	0
1964	0
1968	0
1972	0
1976	0
1980	0
1984	0
1988	0
1992	0
1996	0
2000	0
2004	0
2008	0
2012	0
2016	0
2020	0
2024	0
2028	0
2032	0
2036	0
2040	0
2044	0
2048	0
2052	0
2056	0
2060	0
2064	0
2068	0
2072	0
2076	0
2080	0
2084	0
2088	0
2092	0
2096	0
2100	0
2104	0
2108	0
2112	0
2116	0
2120	0
2124	0
2128	0
2132	0
2136	0
2140	0
2144	0
2148	0
2152	0
2156	0
2160	0
2164	0
2168	0
2172	0
2176	0
2180	0
2184	0
2188	0
2192	0
2196	0
2200	0
2204	0
2208	0
2212	0
2216	0
2220	0
2224	0
2228	0
2232	0
2236	0
2240	0
2244	0
2248	0
2252	0
2256	0
2260	0
2264	0
2268	0
2272	0
2276	0
2280	0
2284	0
2288	0
2292	0
2296	0
2300	0
2304	0
2308	0
2312	0
2316	0
2320	0
2324	0
2328	0
2332	0
2336	0
2340	0
2344	0
2348	0
2352	0
2356	0
2360	0
2364	0
2368	0
2372	0
2376	0
2380	0
2384	0
2388	0
2392	0
2396	0
2400	0
2404	0
2408	0
2412	0
2416	0
2420	0
2424	0
2428	0
2432	0
2436	0
2440	0
2444	0
2448	0
2452	0
2456	0
2460	0
2464	0
2468	0
2472	0
2476	0
2480	0
2484	0
2488	0
2492	0
2496	0
2500	0
2504	0
2508	0
2512	0
2516	0
2520	0
2524	0
2528	0
2532	0
2536	0
2540	0
2544	0
2548	0
2552	0
2556	0
2560	0
2564	0
2568	0
2572	0
2576	0
2580	0
2584	0
2588	0
2592	0
2596	0
2600	0
2604	0
2608	0
2612	0
2616	0
2620	0
2624	0
2628	0
2632	0
2636	0
2640	0
2644	0
2648	0
2652	0
2656	0
2660	0
2664	0
2668	0
2672	0
2676	0
2680	0
2684	0
2688	0
2692	0
2696	0
2700	0
2704	0
2708	0
2712	0
2716	0
2720	0
2724	0
2728	0
2732	0
2736	0
2740	0
2744	0
2748	0
2752	0
2756	0
2760	0
2764	0
2768	0
2772	0
2776	0
2780	0
2784	0
2788	0
2792	0
2796	0
2800	0
2804	0
2808	0
2812	0
2816	0
2820	0
2824	0
2828	0
2832	0
2836	0
2840	0
2844	0
2848	0
2852	0
2856	0
2860	0
2864	0
2868	0
2872	0
2876	0
2880	0
2884	0
2888	0
2892	0
2896	0
2900	0
2904	0
2908	0
2912	0
2916	0
2920	0.111311
2924	0.117115
2928	0.123385
2932	0.130173
2936	0.137536
2940	0.145542
2944	0.154268
2948	0.163802
2952	0.174248
2956	0.185725
2960	0.198375
2964	0.212362
2968	0.227881
2972	0.245165
2976	0.264491
2980	0.286195
2984	0.310683
2988	0.338451
2992	0.370113
2996	0.40643
3000	0.448363
3004	0.49713
3008	0.554299
3012	0.621915
3016	0.702683
3020	0.800245
3024	0.91959
3028	1.06771
3032	1.25462
3036	1.49511
3040	1.81172
3044	2.24015
3048	2.83964
3052	3.71418
3056	5.05965
3060	7.27969
3064	11.31
3068	19.6894
3072	40.8452
3076	105.274
3080	171.294
3084	74.0779
3088	30.7852
3092	15.9262
3096	9.57685
3100	6.35446
3104	4.51174
3108	3.36428
3112	2.60309
3116	2.07297
3120	1.68929
3124	1.40282
3128	1.18335
3132	1.01154
3136	0.87455
3140	0.763579
3144	0.67244
3148	0.596679
3152	0.533025
3156	0.47903
3160	0.432836
3164	0.393012
3168	0.358438
3172	0.32823
3176	0.301684
3180	0.278232
3184	0.25741
3188	0.238841
3192	0.222209
3196	0.207256

## Sheet: CO
Wave number (cm-1)	CO Absorbance
2269.8	4.0692
2259.8	4.9668
2249.8	6.2136
2239.8	8.0256
2229.8	10.8156
2219.8	15.4656
2209.8	24.132
2199.8	43.128
2189.8	95.1384
2179.8	234.829
2179.8	234.829
2169.8	196.261
2159.8	86.4204
2149.8	58.7964
2139.8	70.236
2129.8	141.336
2119.8	267.457
2119.8	267.457
2109.8	135.534
2099.8	56.2884
2089.8	29.3916
2079.8	18.036
2069.8	12.2592
2059.8	8.9196
2049.8	6.8076
2039.8	5.382
2029.8	4.3716
2019.8	3.6276

## Sheet: CO2
Wave number (cm-1)	CO2 Absorbance
600	2.41243
604	3.00266
608	3.83769
612	5.07289
616	7.00789
620	10.2792
624	16.4236
628	29.8419
632	66.0117
636	172.266
640	182.537
644	70.577
648	31.3709
652	17.0644
656	10.5995
660	7.1889
664	5.18457
668	3.91124
672	3.05358
676	2.4491
680	2.00739
684	1.67498
688	1.41864
692	1.21684
696	1.05517
700	0.923665
704	0.815267
708	0.72487
712	0.648701
716	0.583927
720	0.528385
724	0.480401
728	0.438665
732	0.402137
736	0.369987
740	0.341541
744	0.316253
748	0.293672
752	0.273424
756	0.2552
760	0.238739
764	0.223819
768	0.210256
772	0.197888
776	0.186581
780	0.176215
784	0.166689
788	0.157916
792	0.149817
796	0.142325
800	0
804	0
808	0
812	0
816	0
820	0
824	0
828	0
832	0
836	0
840	0
844	0
848	0
852	0
856	0
860	0
864	0
868	0
872	0
876	0
880	0
884	0
888	0
892	0
896	0
900	0
904	0
908	0
912	0
916	0
920	0
924	0
928	0
932	0
936	0
940	0
944	0
948	0
952	0
956	0
960	0
964	0
968	0
972	0
976	0
980	0
984	0
988	0
992	0
996	0
1000	0
1004	0
1008	0
1012	0
1016	0
1020	0
1024	0
1028	0
1032	0
1036	0
1040	0
1044	0
1048	0
1052	0
1056	0
1060	0
1064	0
1068	0
1072	0
1076	0
1080	0
1084	0
1088	0
1092	0
1096	0
1100	0
1104	0
1108	0
1112	0
1116	0
1120	0
1124	0
1128	0
1132	0
1136	0
1140	0
1144	0
1148	0
1152	0
1156	0
1160	0
1164	0
1168	0
1172	0
1176	0
1180	0
1184	0
1188	0
1192	0
1196	0
1200	0
1204	0
1208	0
1212	0
1216	0
1220	0
1224	0
1228	0
1232	0
1236	0
1240	0
1244	0
1248	0
1252	0
1256	0
1260	0
1264	0
1268	0
1272	0
1276	0
1280	0
1284	0
1288	0
1292	0
1296	0
1300	0
1304	0
1308	0
1312	0
1316	0
1320	0
1324	0
1328	0
1332	0
1336	0
1340	0
1344	0
1348	0
1352	0
1356	0
1360	0
1364	0
1368	0
1372	0
1376	0
1380	0
1384	0
1388	0
1392	0
1396	0
1400	0
1404	0
1408	0
1412	0
1416	0
1420	0
1424	0
1428	0
1432	0
1436	0
1440	0
1444	0
1448	0
1452	0
1456	0
1460	0
1464	0
1468	0
1472	0
1476	0
1480	0
1484	0
1488	0
1492	0
1496	0
1500	0
1504	0
1508	0
1512	0
1516	0
1520	0
1524	0
1528	0
1532	0
1536	0
1540	0
1544	0
1548	0
1552	0
1556	0
1560	0
1564	0
1568	0
1572	0
1576	0
1580	0
1584	0
1588	0
1592	0
1596	0
1600	0
1604	0
1608	0
1612	0
1616	0
1620	0
1624	0
1628	0
1632	0
1636	0
1640	0
1644	0
1648	0
1652	0
1656	0
1660	0
1664	0
1668	0
1672	0
1676	0
1680	0
1684	0
1688	0
1692	0
1696	0
1700	0
1704	0
1708	0
1712	0
1716	0
1720	0
1724	0
1728	0
1732	0
1736	0
1740	0
1744	0
1748	0
1752	0
1756	0
1760	0
1764	0
1768	0
1772	0
1776	0
1780	0
1784	0
1788	0
1792	0
1796	0
1800	0
1804	0
1808	0
1812	0
1816	0
1820	0
1824	0
1828	0
1832	0
1836	0
1840	0
1844	0
1848	0
1852	0
1856	0
1860	0
1864	0
1868	0
1872	0
1876	0
1880	0
1884	0
1888	0
1892	0
1896	0
1900	0
1904	0
1908	0
1912	0
1916	0
1920	0
1924	0
1928	0
1932	0
1936	0
1940	0
1944	0
1948	0
1952	0
1956	0
1960	0
1964	0
1968	0
1972	0
1976	0
1980	0
1984	0
1988	0
1992	0
1996	0
2000	0
2004	0
2008	0
2012	0
2016	0
2020	0
2024	0
2028	0
2032	0
2036	0
2040	0
2044	0
2048	0
2052	0
2056	0
2060	0
2064	0
2068	0
2072	0
2076	0
2080	0
2084	0
2088	0
2092	0
2096	0
2100	0
2104	0
2108	0
2112	0
2116	0
2120	0
2124	0
2128	0
2132	0
2136	0
2140	0
2144	0
2148	0
2152	0
2156	0
2160	0
2164	0
2168	0
2172	0
2176	0
2180	0
2184	0
2188	0
2192	0
2196	0
2200	0
2204	0
2208	0
2212	0
2216	0
2220	0
2224	0
2228	0
2232	0
2236	0
2240	0
2244	0
2248	0
2252	0
2256	1.33257
2260	1.40285
2264	1.47883
2268	1.56116
2272	1.65056
2276	1.74786
2280	1.85403
2284	1.97016
2288	2.09755
2292	2.23771
2296	2.39239
2300	2.56368
2304	2.75403
2308	2.96639
2312	3.20428
2316	3.47196
2320	3.77462
2324	4.11861
2328	4.51183
2332	4.96413
2336	5.48794
2340	6.09917
2344	6.81837
2348	7.67253
2352	8.69761
2356	9.94235
2360	11.4742
2364	13.3885
2368	15.8236
2372	18.9865
2376	23.1975
2380	28.9741
2384	37.1943
2388	49.4446
2392	68.8224
2396	102.017
2400	165.534
2404	308.027
2408	704.957
2412	1794.62
2416	1509.3
2420	576.522
2424	265.03
2428	147.527
2432	93.0204
2436	63.7394
2440	46.309
2444	35.1298
2448	27.5449
2452	22.1683
2456	18.2212
2460	15.2393
2464	12.9325
2468	11.1116
2472	9.64928
2476	8.4574
2480	7.47321
2484	6.65117
2488	5.95755
2492	5.36694
2496	4.85994
2500	4.42148
2504	4.03975
2508	3.70537
2512	3.41084
2516	3.15006
2520	2.91807
2524	2.71078
2528	2.52482
2532	2.35734
2536	2.20599
2540	2.06876
2544	1.94394
2548	1.83008
2552	1.72594
2556	1.63043
2560	1.54264
2564	1.46176
2568	1.38706
2572	1.31796
2576	0
2580	0
2584	0
2588	0
2592	0
2596	0

## Sheet: D3
Wave number (cm-1)	D3 Absorbance
-71.6	0.0117813
-71.5	0.0117849
-71.4	0.0117885
-71.3	0.0117922
-71.2	0.0117958
-71.1	0.0117994
-71	0.0118031
-70.9	0.0118067
-70.8	0.0118103
-70.7	0.011814
-70.6	0.0118176
-70.5	0.0118213
-70.4	0.0118249
-70.3	0.0118286
-70.2	0.0118322
-70.1	0.0118359
-70	0.0118396
-69.9	0.0118432
-69.8	0.0118469
-69.7	0.0118506
-69.6	0.0118542
-69.5	0.0118579
-69.4	0.0118616
-69.3	0.0118653
-69.2	0.011869
-69.1	0.0118727
-69	0.0118764
-68.9	0.0118801
-68.8	0.0118838
-68.7	0.0118875
-68.6	0.0118912
-68.5	0.0118949
-68.4	0.0118986
-68.3	0.0119023
-68.2	0.0119061
-68.1	0.0119098
-68	0.0119135
-67.9	0.0119173
-67.8	0.011921
-67.7	0.0119247
-67.6	0.0119285
-67.5	0.0119322
-67.4	0.011936
-67.3	0.0119397
-67.2	0.0119435
-67.1	0.0119472
-67	0.011951
-66.9	0.0119548
-66.8	0.0119585
-66.7	0.0119623
-66.6	0.0119661
-66.5	0.0119699
-66.4	0.0119737
-66.3	0.0119774
-66.2	0.0119812
-66.1	0.011985
-66	0.0119888
-65.9	0.0119926
-65.8	0.0119964
-65.7	0.0120002
-65.6	0.0120041
-65.5	0.0120079
-65.4	0.0120117
-65.3	0.0120155
-65.2	0.0120193
-65.1	0.0120232
-65	0.012027
-64.9	0.0120308
-64.8	0.0120347
-64.7	0.0120385
-64.6	0.0120424
-64.5	0.0120462
-64.4	0.0120501
-64.3	0.0120539
-64.2	0.0120578
-64.1	0.0120617
-64	0.0120655
-63.9	0.0120694
-63.8	0.0120733
-63.7	0.0120772
-63.6	0.012081
-63.5	0.0120849
-63.4	0.0120888
-63.3	0.0120927
-63.2	0.0120966
-63.1	0.0121005
-63	0.0121044
-62.9	0.0121083
-62.8	0.0121123
-62.7	0.0121162
-62.6	0.0121201
-62.5	0.012124
-62.4	0.012128
-62.3	0.0121319
-62.2	0.0121358
-62.1	0.0121398
-62	0.0121437
-61.9	0.0121477
-61.8	0.0121516
-61.7	0.0121556
-61.6	0.0121595
-61.5	0.0121635
-61.4	0.0121675
-61.3	0.0121714
-61.2	0.0121754
-61.1	0.0121794
-61	0.0121834
-60.9	0.0121874
-60.8	0.0121914
-60.7	0.0121954
-60.6	0.0121994
-60.5	0.0122034
-60.4	0.0122074
-60.3	0.0122114
-60.2	0.0122154
-60.1	0.0122194
-60	0.0122235
-59.9	0.0122275
-59.8	0.0122315
-59.7	0.0122355
-59.6	0.0122396
-59.5	0.0122436
-59.4	0.0122477
-59.3	0.0122517
-59.2	0.0122558
-59.1	0.0122599
-59	0.0122639
-58.9	0.012268
-58.8	0.0122721
-58.7	0.0122762
-58.6	0.0122802
-58.5	0.0122843
-58.4	0.0122884
-58.3	0.0122925
-58.2	0.0122966
-58.1	0.0123007
-58	0.0123048
-57.9	0.0123089
-57.8	0.0123131
-57.7	0.0123172
-57.6	0.0123213
-57.5	0.0123254
-57.4	0.0123296
-57.3	0.0123337
-57.2	0.0123379
-57.1	0.012342
-57	0.0123462
-56.9	0.0123503
-56.8	0.0123545
-56.7	0.0123587
-56.6	0.0123628
-56.5	0.012367
-56.4	0.0123712
-56.3	0.0123754
-56.2	0.0123796
-56.1	0.0123837
-56	0.0123879
-55.9	0.0123921
-55.8	0.0123964
-55.7	0.0124006
-55.6	0.0124048
-55.5	0.012409
-55.4	0.0124132
-55.3	0.0124175
-55.2	0.0124217
-55.1	0.0124259
-55	0.0124302
-54.9	0.0124344
-54.8	0.0124387
-54.7	0.012443
-54.6	0.0124472
-54.5	0.0124515
-54.4	0.0124558
-54.3	0.01246
-54.2	0.0124643
-54.1	0.0124686
-54	0.0124729
-53.9	0.0124772
-53.8	0.0124815
-53.7	0.0124858
-53.6	0.0124901
-53.5	0.0124944
-53.4	0.0124988
-53.3	0.0125031
-53.2	0.0125074
-53.1	0.0125118
-53	0.0125161
-52.9	0.0125205
-52.8	0.0125248
-52.7	0.0125292
-52.6	0.0125335
-52.5	0.0125379
-52.4	0.0125423
-52.3	0.0125467
-52.2	0.012551
-52.1	0.0125554
-52	0.0125598
-51.9	0.0125642
-51.8	0.0125686
-51.7	0.012573
-51.6	0.0125775
-51.5	0.0125819
-51.4	0.0125863
-51.3	0.0125907
-51.2	0.0125952
-51.1	0.0125996
-51	0.0126041
-50.9	0.0126085
-50.8	0.012613
-50.7	0.0126174
-50.6	0.0126219
-50.5	0.0126264
-50.4	0.0126309
-50.3	0.0126353
-50.2	0.0126398
-50.1	0.0126443
-50	0.0126488
-49.9	0.0126533
-49.8	0.0126578
-49.7	0.0126624
-49.6	0.0126669
-49.5	0.0126714
-49.4	0.012676
-49.3	0.0126805
-49.2	0.012685
-49.1	0.0126896
-49	0.0126942
-48.9	0.0126987
-48.8	0.0127033
-48.7	0.0127079
-48.6	0.0127125
-48.5	0.012717
-48.4	0.0127216
-48.3	0.0127262
-48.2	0.0127308
-48.1	0.0127354
-48	0.0127401
-47.9	0.0127447
-47.8	0.0127493
-47.7	0.012754
-47.6	0.0127586
-47.5	0.0127632
-47.4	0.0127679
-47.3	0.0127726
-47.2	0.0127772
-47.1	0.0127819
-47	0.0127866
-46.9	0.0127913
-46.8	0.0127959
-46.7	0.0128006
-46.6	0.0128053
-46.5	0.01281
-46.4	0.0128148
-46.3	0.0128195
-46.2	0.0128242
-46.1	0.0128289
-46	0.0128337
-45.9	0.0128384
-45.8	0.0128432
-45.7	0.012848
-45.6	0.0128527
-45.5	0.0128575
-45.4	0.0128623
-45.3	0.0128671
-45.2	0.0128718
-45.1	0.0128766
-45	0.0128815
-44.9	0.0128863
-44.8	0.0128911
-44.7	0.0128959
-44.6	0.0129007
-44.5	0.0129056
-44.4	0.0129104
-44.3	0.0129153
-44.2	0.0129201
-44.1	0.012925
-44	0.0129299
-43.9	0.0129348
-43.8	0.0129396
-43.7	0.0129445
-43.6	0.0129494
-43.5	0.0129544
-43.4	0.0129593
-43.3	0.0129642
-43.2	0.0129691
-43.1	0.0129741
-43	0.012979
-42.9	0.012984
-42.8	0.0129889
-42.7	0.0129939
-42.6	0.0129988
-42.5	0.0130038
-42.4	0.0130088
-42.3	0.0130138
-42.2	0.0130188
-42.1	0.0130238
-42	0.0130288
-41.9	0.0130339
-41.8	0.0130389
-41.7	0.0130439
-41.6	0.013049
-41.5	0.013054
-41.4	0.0130591
-41.3	0.0130642
-41.2	0.0130692
-41.1	0.0130743
-41	0.0130794
-40.9	0.0130845
-40.8	0.0130896
-40.7	0.0130947
-40.6	0.0130999
-40.5	0.013105
-40.4	0.0131101
-40.3	0.0131153
-40.2	0.0131204
-40.1	0.0131256
-40	0.0131308
-39.9	0.013136
-39.8	0.0131412
-39.7	0.0131463
-39.6	0.0131516
-39.5	0.0131568
-39.4	0.013162
-39.3	0.0131672
-39.2	0.0131725
-39.1	0.0131777
-39	0.013183
-38.9	0.0131882
-38.8	0.0131935
-38.7	0.0131988
-38.6	0.0132041
-38.5	0.0132094
-38.4	0.0132147
-38.3	0.01322
-38.2	0.0132253
-38.1	0.0132306
-38	0.013236
-37.9	0.0132413
-37.8	0.0132467
-37.7	0.013252
-37.6	0.0132574
-37.5	0.0132628
-37.4	0.0132682
-37.3	0.0132736
-37.2	0.013279
-37.1	0.0132844
-37	0.0132899
-36.9	0.0132953
-36.8	0.0133008
-36.7	0.0133062
-36.6	0.0133117
-36.5	0.0133172
-36.4	0.0133226
-36.3	0.0133281
-36.2	0.0133336
-36.1	0.0133392
-36	0.0133447
-35.9	0.0133502
-35.8	0.0133558
-35.7	0.0133613
-35.6	0.0133669
-35.5	0.0133724
-35.4	0.013378
-35.3	0.0133836
-35.2	0.0133892
-35.1	0.0133948
-35	0.0134005
-34.9	0.0134061
-34.8	0.0134117
-34.7	0.0134174
-34.6	0.013423
-34.5	0.0134287
-34.4	0.0134344
-34.3	0.0134401
-34.2	0.0134458
-34.1	0.0134515
-34	0.0134572
-33.9	0.013463
-33.8	0.0134687
-33.7	0.0134745
-33.6	0.0134802
-33.5	0.013486
-33.4	0.0134918
-33.3	0.0134976
-33.2	0.0135034
-33.1	0.0135092
-33	0.0135151
-32.9	0.0135209
-32.8	0.0135268
-32.7	0.0135326
-32.6	0.0135385
-32.5	0.0135444
-32.4	0.0135503
-32.3	0.0135562
-32.2	0.0135621
-32.1	0.0135681
-32	0.013574
-31.9	0.01358
-31.8	0.0135859
-31.7	0.0135919
-31.6	0.0135979
-31.5	0.0136039
-31.4	0.0136099
-31.3	0.013616
-31.2	0.013622
-31.1	0.0136281
-31	0.0136341
-30.9	0.0136402
-30.8	0.0136463
-30.7	0.0136524
-30.6	0.0136585
-30.5	0.0136646
-30.4	0.0136708
-30.3	0.0136769
-30.2	0.0136831
-30.1	0.0136893
-30	0.0136954
-29.9	0.0137016
-29.8	0.0137079
-29.7	0.0137141
-29.6	0.0137203
-29.5	0.0137266
-29.4	0.0137328
-29.3	0.0137391
-29.2	0.0137454
-29.1	0.0137517
-29	0.013758
-28.9	0.0137644
-28.8	0.0137707
-28.7	0.0137771
-28.6	0.0137835
-28.5	0.0137898
-28.4	0.0137962
-28.3	0.0138027
-28.2	0.0138091
-28.1	0.0138155
-28	0.013822
-27.9	0.0138285
-27.8	0.0138349
-27.7	0.0138414
-27.6	0.013848
-27.5	0.0138545
-27.4	0.013861
-27.3	0.0138676
-27.2	0.0138742
-27.1	0.0138808
-27	0.0138874
-26.9	0.013894
-26.8	0.0139006
-26.7	0.0139073
-26.6	0.0139139
-26.5	0.0139206
-26.4	0.0139273
-26.3	0.013934
-26.2	0.0139407
-26.1	0.0139475
-26	0.0139542
-25.9	0.013961
-25.8	0.0139678
-25.7	0.0139746
-25.6	0.0139814
-25.5	0.0139883
-25.4	0.0139951
-25.3	0.014002
-25.2	0.0140089
-25.1	0.0140158
-25	0.0140227
-24.9	0.0140296
-24.8	0.0140366
-24.7	0.0140435
-24.6	0.0140505
-24.5	0.0140575
-24.4	0.0140646
-24.3	0.0140716
-24.2	0.0140787
-24.1	0.0140857
-24	0.0140928
-23.9	0.0140999
-23.8	0.0141071
-23.7	0.0141142
-23.6	0.0141214
-23.5	0.0141285
-23.4	0.0141357
-23.3	0.014143
-23.2	0.0141502
-23.1	0.0141575
-23	0.0141647
-22.9	0.014172
-22.8	0.0141793
-22.7	0.0141867
-22.6	0.014194
-22.5	0.0142014
-22.4	0.0142088
-22.3	0.0142162
-22.2	0.0142236
-22.1	0.014231
-22	0.0142385
-21.9	0.014246
-21.8	0.0142535
-21.7	0.014261
-21.6	0.0142686
-21.5	0.0142761
-21.4	0.0142837
-21.3	0.0142913
-21.2	0.014299
-21.1	0.0143066
-21	0.0143143
-20.9	0.014322
-20.8	0.0143297
-20.7	0.0143374
-20.6	0.0143452
-20.5	0.014353
-20.4	0.0143608
-20.3	0.0143686
-20.2	0.0143764
-20.1	0.0143843
-20	0.0143922
-19.9	0.0144001
-19.8	0.0144081
-19.7	0.014416
-19.6	0.014424
-19.5	0.014432
-19.4	0.01444
-19.3	0.0144481
-19.2	0.0144561
-19.1	0.0144642
-19	0.0144724
-18.9	0.0144805
-18.8	0.0144887
-18.7	0.0144969
-18.6	0.0145051
-18.5	0.0145133
-18.4	0.0145216
-18.3	0.0145299
-18.2	0.0145382
-18.1	0.0145466
-18	0.0145549
-17.9	0.0145633
-17.8	0.0145718
-17.7	0.0145802
-17.6	0.0145887
-17.5	0.0145972
-17.4	0.0146057
-17.3	0.0146143
-17.2	0.0146229
-17.1	0.0146315
-17	0.0146401
-16.9	0.0146488
-16.8	0.0146575
-16.7	0.0146662
-16.6	0.0146749
-16.5	0.0146837
-16.4	0.0146925
-16.3	0.0147013
-16.2	0.0147102
-16.1	0.0147191
-16	0.014728
-15.9	0.0147369
-15.8	0.0147459
-15.7	0.0147549
-15.6	0.014764
-15.5	0.014773
-15.4	0.0147821
-15.3	0.0147913
-15.2	0.0148004
-15.1	0.0148096
-15	0.0148188
-14.9	0.0148281
-14.8	0.0148374
-14.7	0.0148467
-14.6	0.014856
-14.5	0.0148654
-14.4	0.0148748
-14.3	0.0148843
-14.2	0.0148938
-14.1	0.0149033
-14	0.0149128
-13.9	0.0149224
-13.8	0.014932
-13.7	0.0149417
-13.6	0.0149514
-13.5	0.0149611
-13.4	0.0149708
-13.3	0.0149806
-13.2	0.0149905
-13.1	0.0150003
-13	0.0150102
-12.9	0.0150202
-12.8	0.0150301
-12.7	0.0150401
-12.6	0.0150502
-12.5	0.0150603
-12.4	0.0150704
-12.3	0.0150805
-12.2	0.0150907
-12.1	0.015101
-12	0.0151113
-11.9	0.0151216
-11.8	0.0151319
-11.7	0.0151423
-11.6	0.0151528
-11.5	0.0151632
-11.4	0.0151737
-11.3	0.0151843
-11.2	0.0151949
-11.1	0.0152055
-11	0.0152162
-10.9	0.0152269
-10.8	0.0152377
-10.7	0.0152485
-10.6	0.0152594
-10.5	0.0152703
-10.4	0.0152812
-10.3	0.0152922
-10.2	0.0153032
-10.1	0.0153143
-10	0.0153254
-9.9	0.0153366
-9.8	0.0153478
-9.7	0.0153591
-9.6	0.0153704
-9.5	0.0153817
-9.4	0.0153931
-9.3	0.0154046
-9.2	0.0154161
-9.1	0.0154276
-9	0.0154392
-8.9	0.0154508
-8.8	0.0154625
-8.7	0.0154743
-8.6	0.0154861
-8.5	0.0154979
-8.4	0.0155098
-8.3	0.0155218
-8.2	0.0155338
-8.1	0.0155458
-8	0.015558
-7.9	0.0155701
-7.8	0.0155823
-7.7	0.0155946
-7.6	0.0156069
-7.5	0.0156193
-7.4	0.0156318
-7.3	0.0156443
-7.2	0.0156568
-7.1	0.0156694
-7	0.0156821
-6.9	0.0156948
-6.8	0.0157076
-6.7	0.0157205
-6.6	0.0157334
-6.5	0.0157463
-6.4	0.0157594
-6.3	0.0157724
-6.2	0.0157856
-6.1	0.0157988
-6	0.0158121
-5.9	0.0158254
-5.8	0.0158388
-5.7	0.0158523
-5.6	0.0158658
-5.5	0.0158794
-5.4	0.0158931
-5.3	0.0159069
-5.2	0.0159207
-5.1	0.0159345
-5	0.0159485
-4.9	0.0159625
-4.8	0.0159766
-4.7	0.0159907
-4.6	0.0160049
-4.5	0.0160192
-4.4	0.0160336
-4.3	0.016048
-4.2	0.0160626
-4.1	0.0160772
-4	0.0160918
-3.9	0.0161066
-3.8	0.0161214
-3.7	0.0161363
-3.6	0.0161513
-3.5	0.0161663
-3.4	0.0161814
-3.3	0.0161967
-3.2	0.016212
-3.1	0.0162273
-3	0.0162428
-2.9	0.0162583
-2.8	0.016274
-2.7	0.0162897
-2.6	0.0163055
-2.5	0.0163214
-2.4	0.0163373
-2.3	0.0163534
-2.2	0.0163695
-2.1	0.0163858
-2	0.0164021
-1.9	0.0164185
-1.8	0.016435
-1.7	0.0164517
-1.6	0.0164684
-1.5	0.0164852
-1.4	0.0165021
-1.3	0.016519
-1.2	0.0165361
-1.1	0.0165533
-1	0.0165706
-0.9	0.016588
-0.8	0.0166055
-0.7	0.0166231
-0.6	0.0166408
-0.5	0.0166586
-0.4	0.0166765
-0.3	0.0166945
-0.2	0.0167126
-0.1	0.0167309
0	0.0167492
0.1	0.0167677
0.2	0.0167862
0.3	0.0168049
0.4	0.0168237
0.5	0.0168426
0.6	0.0168617
0.7	0.0168808
0.8	0.0169001
0.9	0.0169195
1	0.016939
1.1	0.0169586
1.2	0.0169784
1.3	0.0169982
1.4	0.0170182
1.5	0.0170384
1.6	0.0170587
1.7	0.0170791
1.8	0.0170996
1.9	0.0171202
2	0.0171411
2.1	0.017162
2.2	0.0171831
2.3	0.0172043
2.4	0.0172256
2.5	0.0172471
2.6	0.0172688
2.7	0.0172906
2.8	0.0173125
2.9	0.0173346
3	0.0173568
3.1	0.0173792
3.2	0.0174017
3.3	0.0174244
3.4	0.0174473
3.5	0.0174703
3.6	0.0174935
3.7	0.0175168
3.8	0.0175403
3.9	0.0175639
4	0.0175878
4.1	0.0176118
4.2	0.0176359
4.3	0.0176603
4.4	0.0176848
4.5	0.0177095
4.6	0.0177343
4.7	0.0177594
4.8	0.0177846
4.9	0.01781
5	0.0178356
5.1	0.0178614
5.2	0.0178874
5.3	0.0179136
5.4	0.01794
5.5	0.0179665
5.6	0.0179933
5.7	0.0180203
5.8	0.0180475
5.9	0.0180748
6	0.0181024
6.1	0.0181302
6.2	0.0181583
6.3	0.0181865
6.4	0.0182149
6.5	0.0182436
6.6	0.0182725
6.7	0.0183016
6.8	0.018331
6.9	0.0183606
7	0.0183904
7.1	0.0184205
7.2	0.0184508
7.3	0.0184813
7.4	0.0185121
7.5	0.0185431
7.6	0.0185744
7.7	0.0186059
7.8	0.0186377
7.9	0.0186698
8	0.0187021
8.1	0.0187347
8.2	0.0187676
8.3	0.0188007
8.4	0.0188341
8.5	0.0188678
8.6	0.0189018
8.7	0.018936
8.8	0.0189706
8.9	0.0190054
9	0.0190406
9.1	0.019076
9.2	0.0191117
9.3	0.0191478
9.4	0.0191842
9.5	0.0192209
9.6	0.0192579
9.7	0.0192952
9.8	0.0193328
9.9	0.0193708
10	0.0194091
10.1	0.0194478
10.2	0.0194868
10.3	0.0195261
10.4	0.0195659
10.5	0.0196059
10.6	0.0196463
10.7	0.0196871
10.8	0.0197283
10.9	0.0197698
11	0.0198117
11.1	0.019854
11.2	0.0198967
11.3	0.0199398
11.4	0.0199833
11.5	0.0200272
11.6	0.0200715
11.7	0.0201162
11.8	0.0201613
11.9	0.0202069
12	0.0202528
12.1	0.0202993
12.2	0.0203461
12.3	0.0203934
12.4	0.0204412
12.5	0.0204894
12.6	0.0205381
12.7	0.0205873
12.8	0.0206369
12.9	0.020687
13	0.0207376
13.1	0.0207887
13.2	0.0208403
13.3	0.0208924
13.4	0.020945
13.5	0.0209982
13.6	0.0210518
13.7	0.021106
13.8	0.0211608
13.9	0.021216
14	0.0212719
14.1	0.0213283
14.2	0.0213852
14.3	0.0214428
14.4	0.0215009
14.5	0.0215596
14.6	0.0216189
14.7	0.0216788
14.8	0.0217394
14.9	0.0218005
15	0.0218623
15.1	0.0219247
15.2	0.0219878
15.3	0.0220515
15.4	0.0221158
15.5	0.0221809
15.6	0.0222466
15.7	0.022313
15.8	0.0223801
15.9	0.0224479
16	0.0225164
16.1	0.0225856
16.2	0.0226555
16.3	0.0227262
16.4	0.0227977
16.5	0.0228698
16.6	0.0229428
16.7	0.0230165
16.8	0.023091
16.9	0.0231663
17	0.0232424
17.1	0.0233193
17.2	0.023397
17.3	0.0234756
17.4	0.023555
17.5	0.0236352
17.6	0.0237163
17.7	0.0237983
17.8	0.0238812
17.9	0.0239649
18	0.0240495
18.1	0.0241351
18.2	0.0242215
18.3	0.0243089
18.4	0.0243972
18.5	0.0244865
18.6	0.0245767
18.7	0.0246679
18.8	0.0247601
18.9	0.0248532
19	0.0249474
19.1	0.0250425
19.2	0.0251387
19.3	0.0252359
19.4	0.0253341
19.5	0.0254333
19.6	0.0255337
19.7	0.025635
19.8	0.0257375
19.9	0.025841
20	0.0259457
20.1	0.0260514
20.2	0.0261582
20.3	0.0262661
20.4	0.0263752
20.5	0.0264854
20.6	0.0265967
20.7	0.0267092
20.8	0.0268229
20.9	0.0269377
21	0.0270536
21.1	0.0271708
21.2	0.0272891
21.3	0.0274086
21.4	0.0275293
21.5	0.0276512
21.6	0.0277743
21.7	0.0278986
21.8	0.0280241
21.9	0.0281508
22	0.0282788
22.1	0.0284079
22.2	0.0285383
22.3	0.0286699
22.4	0.0288027
22.5	0.0289368
22.6	0.029072
22.7	0.0292085
22.8	0.0293462
22.9	0.0294851
23	0.0296253
23.1	0.0297666
23.2	0.0299092
23.3	0.0300529
23.4	0.0301979
23.5	0.030344
23.6	0.0304913
23.7	0.0306398
23.8	0.0307894
23.9	0.0309402
24	0.0310921
24.1	0.0312451
24.2	0.0313993
24.3	0.0315545
24.4	0.0317109
24.5	0.0318683
24.6	0.0320267
24.7	0.0321862
24.8	0.0323467
24.9	0.0325081
25	0.0326705
25.1	0.0328339
25.2	0.0329982
25.3	0.0331634
25.4	0.0333294
25.5	0.0334963
25.6	0.033664
25.7	0.0338325
25.8	0.0340017
25.9	0.0341716
26	0.0343423
26.1	0.0345135
26.2	0.0346854
26.3	0.0348579
26.4	0.0350309
26.5	0.0352044
26.6	0.0353784
26.7	0.0355528
26.8	0.0357276
26.9	0.0359028
27	0.0360782
27.1	0.036254
27.2	0.0364299
27.3	0.036606
27.4	0.0367822
27.5	0.0369585
27.6	0.0371349
27.7	0.0373112
27.8	0.0374875
27.9	0.0376636
28	0.0378396
28.1	0.0380154
28.2	0.038191
28.3	0.0383663
28.4	0.0385412
28.5	0.0387157
28.6	0.0388898
28.7	0.0390633
28.8	0.0392364
28.9	0.0394088
29	0.0395806
29.1	0.0397517
29.2	0.0399221
29.3	0.0400916
29.4	0.0402604
29.5	0.0404282
29.6	0.0405951
29.7	0.040761
29.8	0.0409259
29.9	0.0410897
30	0.0412523
30.1	0.0414138
30.2	0.041574
30.3	0.041733
30.4	0.0418906
30.5	0.0420469
30.6	0.0422017
30.7	0.042355
30.8	0.0425068
30.9	0.0426571
31	0.0428057
31.1	0.0429526
31.2	0.0430978
31.3	0.0432412
31.4	0.0433828
31.5	0.0435224
31.6	0.0436602
31.7	0.0437959
31.8	0.0439296
31.9	0.0440612
32	0.0441906
32.1	0.0443178
32.2	0.0444427
32.3	0.0445653
32.4	0.0446854
32.5	0.0448031
32.6	0.0449183
32.7	0.0450309
32.8	0.0451408
32.9	0.045248
33	0.0453524
33.1	0.0454539
33.2	0.0455526
33.3	0.0456482
33.4	0.0457408
33.5	0.0458302
33.6	0.0459164
33.7	0.0459994
33.8	0.0460791
33.9	0.0461553
34	0.046228
34.1	0.0462972
34.2	0.0463628
34.3	0.0464247
34.4	0.0464828
34.5	0.0465371
34.6	0.0465875
34.7	0.0466339
34.8	0.0466764
34.9	0.0467147
35	0.046749
35.1	0.046779
35.2	0.0468048
35.3	0.0468262
35.4	0.0468434
35.5	0.0468561
35.6	0.0468644
35.7	0.0468682
35.8	0.0468675
35.9	0.0468623
36	0.0468524
36.1	0.046838
36.2	0.046819
36.3	0.0467953
36.4	0.046767
36.5	0.0467341
36.6	0.0466965
36.7	0.0466542
36.8	0.0466073
36.9	0.0465558
37	0.0464997
37.1	0.046439
37.2	0.0463737
37.3	0.0463039
37.4	0.0462296
37.5	0.0461509
37.6	0.0460678
37.7	0.0459803
37.8	0.0458886
37.9	0.0457926
38	0.0456924
38.1	0.0455882
38.2	0.0454799
38.3	0.0453678
38.4	0.0452517
38.5	0.0451319
38.6	0.0450083
38.7	0.0448812
38.8	0.0447506
38.9	0.0446166
39	0.0444793
39.1	0.0443388
39.2	0.0441951
39.3	0.0440485
39.4	0.043899
39.5	0.0437468
39.6	0.0435918
39.7	0.0434343
39.8	0.0432744
39.9	0.0431121
40	0.0429476
40.1	0.0427811
40.2	0.0426125
40.3	0.042442
40.4	0.0422698
40.5	0.0420959
40.6	0.0419205
40.7	0.0417437
40.8	0.0415655
40.9	0.0413861
41	0.0412056
41.1	0.0410241
41.2	0.0408417
41.3	0.0406585
41.4	0.0404746
41.5	0.04029
41.6	0.040105
41.7	0.0399195
41.8	0.0397338
41.9	0.0395477
42	0.0393616
42.1	0.0391753
42.2	0.0389891
42.3	0.0388029
42.4	0.038617
42.5	0.0384312
42.6	0.0382458
42.7	0.0380608
42.8	0.0378762
42.9	0.0376921
43	0.0375086
43.1	0.0373258
43.2	0.0371436
43.3	0.0369622
43.4	0.0367815
43.5	0.0366017
43.6	0.0364229
43.7	0.0362449
43.8	0.0360679
43.9	0.035892
44	0.0357171
44.1	0.0355433
44.2	0.0353706
44.3	0.0351991
44.4	0.0350288
44.5	0.0348598
44.6	0.0346919
44.7	0.0345254
44.8	0.0343601
44.9	0.0341961
45	0.0340335
45.1	0.0338723
45.2	0.0337124
45.3	0.0335539
45.4	0.0333968
45.5	0.0332411
45.6	0.0330868
45.7	0.0329339
45.8	0.0327825
45.9	0.0326326
46	0.0324841
46.1	0.032337
46.2	0.0321914
46.3	0.0320473
46.4	0.0319046
46.5	0.0317634
46.6	0.0316237
46.7	0.0314854
46.8	0.0313486
46.9	0.0312133
47	0.0310794
47.1	0.030947
47.2	0.030816
47.3	0.0306865
47.4	0.0305584
47.5	0.0304317
47.6	0.0303065
47.7	0.0301826
47.8	0.0300602
47.9	0.0299392
48	0.0298196
48.1	0.0297014
48.2	0.0295846
48.3	0.0294691
48.4	0.029355
48.5	0.0292422
48.6	0.0291308
48.7	0.0290207
48.8	0.0289119
48.9	0.0288044
49	0.0286982
49.1	0.0285933
49.2	0.0284897
49.3	0.0283873
49.4	0.0282862
49.5	0.0281863
49.6	0.0280876
49.7	0.0279902
49.8	0.0278939
49.9	0.0277989
50	0.027705
50.1	0.0276123
50.2	0.0275207
50.3	0.0274303
50.4	0.027341
50.5	0.0272528
50.6	0.0271658
50.7	0.0270798
50.8	0.0269949
50.9	0.026911
51	0.0268283
51.1	0.0267465
51.2	0.0266658
51.3	0.0265862
51.4	0.0265075
51.5	0.0264298
51.6	0.0263531
51.7	0.0262774
51.8	0.0262027
51.9	0.0261289
52	0.026056
52.1	0.0259841
52.2	0.025913
52.3	0.0258429
52.4	0.0257737
52.5	0.0257054
52.6	0.0256379
52.7	0.0255713
52.8	0.0255055
52.9	0.0254406
53	0.0253765
53.1	0.0253133
53.2	0.0252508
53.3	0.0251891
53.4	0.0251283
53.5	0.0250682
53.6	0.0250089
53.7	0.0249503
53.8	0.0248925
53.9	0.0248354
54	0.0247791
54.1	0.0247235
54.2	0.0246686
54.3	0.0246144
54.4	0.0245609
54.5	0.0245081
54.6	0.0244559
54.7	0.0244045
54.8	0.0243537
54.9	0.0243035
55	0.024254
55.1	0.0242051
55.2	0.0241569
55.3	0.0241092
55.4	0.0240622
55.5	0.0240158
55.6	0.02397
55.7	0.0239247
55.8	0.0238801
55.9	0.023836
56	0.0237925
56.1	0.0237495
56.2	0.0237071
56.3	0.0236653
56.4	0.023624
56.5	0.0235832
56.6	0.0235429
56.7	0.0235032
56.8	0.0234639
56.9	0.0234252
57	0.023387
57.1	0.0233492
57.2	0.023312
57.3	0.0232752
57.4	0.0232389
57.5	0.0232031
57.6	0.0231677
57.7	0.0231328
57.8	0.0230983
57.9	0.0230643
58	0.0230307
58.1	0.0229975
58.2	0.0229648
58.3	0.0229325
58.4	0.0229006
58.5	0.0228692
58.6	0.0228381
58.7	0.0228075
58.8	0.0227772
58.9	0.0227473
59	0.0227178
59.1	0.0226887
59.2	0.02266
59.3	0.0226317
59.4	0.0226037
59.5	0.0225761
59.6	0.0225488
59.7	0.0225219
59.8	0.0224954
59.9	0.0224692
60	0.0224433
60.1	0.0224178
60.2	0.0223926
60.3	0.0223678
60.4	0.0223433
60.5	0.0223191
60.6	0.0222952
60.7	0.0222716
60.8	0.0222484
60.9	0.0222254
61	0.0222028
61.1	0.0221804
61.2	0.0221584
61.3	0.0221366
61.4	0.0221152
61.5	0.022094
61.6	0.0220731
61.7	0.0220525
61.8	0.0220322
61.9	0.0220121
62	0.0219923
62.1	0.0219728
62.2	0.0219535
62.3	0.0219345
62.4	0.0219158
62.5	0.0218973
62.6	0.0218791
62.7	0.0218611
62.8	0.0218433
62.9	0.0218258
63	0.0218086
63.1	0.0217916
63.2	0.0217748
63.3	0.0217583
63.4	0.0217419
63.5	0.0217259
63.6	0.02171
63.7	0.0216944
63.8	0.0216789
63.9	0.0216637
64	0.0216488
64.1	0.021634
64.2	0.0216194
64.3	0.0216051
64.4	0.0215909
64.5	0.021577
64.6	0.0215633
64.7	0.0215497
64.8	0.0215364
64.9	0.0215232
65	0.0215103
65.1	0.0214975
65.2	0.0214849
65.3	0.0214726
65.4	0.0214604
65.5	0.0214483
65.6	0.0214365
65.7	0.0214249
65.8	0.0214134
65.9	0.0214021
66	0.0213909
66.1	0.02138
66.2	0.0213692
66.3	0.0213586
66.4	0.0213481
66.5	0.0213378
66.6	0.0213277
66.7	0.0213178
66.8	0.021308
66.9	0.0212983
67	0.0212888
67.1	0.0212795
67.2	0.0212703
67.3	0.0212613
67.4	0.0212524
67.5	0.0212437
67.6	0.0212351
67.7	0.0212267
67.8	0.0212184
67.9	0.0212103
68	0.0212023
68.1	0.0211944
68.2	0.0211867
68.3	0.0211791
68.4	0.0211717
68.5	0.0211644
68.6	0.0211572
68.7	0.0211501
68.8	0.0211432
68.9	0.0211364
69	0.0211298
69.1	0.0211233
69.2	0.0211169
69.3	0.0211106
69.4	0.0211044
69.5	0.0210984
69.6	0.0210925
69.7	0.0210867
69.8	0.021081
69.9	0.0210755
70	0.0210701
70.1	0.0210647
70.2	0.0210595
70.3	0.0210545
70.4	0.0210495
70.5	0.0210446
70.6	0.0210399
70.7	0.0210352
70.8	0.0210307
70.9	0.0210263
71	0.021022
71.1	0.0210177
71.2	0.0210136
71.3	0.0210096
71.4	0.0210057
71.5	0.0210019
71.6	0.0209982
71.7	0.0209947
71.8	0.0209912
71.9	0.0209878
72	0.0209845
72.1	0.0209813
72.2	0.0209782
72.3	0.0209752
72.4	0.0209722
72.5	0.0209694
72.6	0.0209667
72.7	0.0209641
72.8	0.0209615
72.9	0.0209591
73	0.0209567
73.1	0.0209544
73.2	0.0209523
73.3	0.0209502
73.4	0.0209482
73.5	0.0209462
73.6	0.0209444
73.7	0.0209427
73.8	0.020941
73.9	0.0209394
74	0.0209379
74.1	0.0209365
74.2	0.0209352
74.3	0.0209339
74.4	0.0209327
74.5	0.0209316
74.6	0.0209306
74.7	0.0209297
74.8	0.0209288
74.9	0.020928
75	0.0209273
75.1	0.0209267
75.2	0.0209262
75.3	0.0209257
75.4	0.0209253
75.5	0.0209249
75.6	0.0209247
75.7	0.0209245
75.8	0.0209244
75.9	0.0209243
76	0.0209244
76.1	0.0209245
76.2	0.0209247
76.3	0.0209249
76.4	0.0209252
76.5	0.0209256
76.6	0.020926
76.7	0.0209265
76.8	0.0209271
76.9	0.0209278
77	0.0209285
77.1	0.0209293
77.2	0.0209301
77.3	0.020931
77.4	0.020932
77.5	0.0209331
77.6	0.0209342
77.7	0.0209353
77.8	0.0209365
77.9	0.0209378
78	0.0209392
78.1	0.0209406
78.2	0.0209421
78.3	0.0209436
78.4	0.0209452
78.5	0.0209469
78.6	0.0209486
78.7	0.0209504
78.8	0.0209522
78.9	0.0209541
79	0.020956
79.1	0.020958
79.2	0.0209601
79.3	0.0209622
79.4	0.0209644
79.5	0.0209666
79.6	0.0209689
79.7	0.0209713
79.8	0.0209737
79.9	0.0209761
80	0.0209786
80.1	0.0209812
80.2	0.0209838
80.3	0.0209865
80.4	0.0209892
80.5	0.020992
80.6	0.0209948
80.7	0.0209977
80.8	0.0210006
80.9	0.0210036
81	0.0210066
81.1	0.0210097
81.2	0.0210128
81.3	0.021016
81.4	0.0210193
81.5	0.0210225
81.6	0.0210259
81.7	0.0210293
81.8	0.0210327
81.9	0.0210362
82	0.0210397
82.1	0.0210433
82.2	0.0210469
82.3	0.0210506
82.4	0.0210543
82.5	0.0210581
82.6	0.0210619
82.7	0.0210658
82.8	0.0210697
82.9	0.0210736
83	0.0210776
83.1	0.0210817
83.2	0.0210858
83.3	0.0210899
83.4	0.0210941
83.5	0.0210983
83.6	0.0211026
83.7	0.0211069
83.8	0.0211113
83.9	0.0211157
84	0.0211201
84.1	0.0211246
84.2	0.0211291
84.3	0.0211337
84.4	0.0211383
84.5	0.021143
84.6	0.0211477
84.7	0.0211525
84.8	0.0211572
84.9	0.0211621
85	0.021167
85.1	0.0211719
85.2	0.0211768
85.3	0.0211818
85.4	0.0211869
85.5	0.021192
85.6	0.0211971
85.7	0.0212022
85.8	0.0212074
85.9	0.0212127
86	0.021218
86.1	0.0212233
86.2	0.0212287
86.3	0.0212341
86.4	0.0212395
86.5	0.021245
86.6	0.0212505
86.7	0.0212561
86.8	0.0212617
86.9	0.0212673
87	0.021273
87.1	0.0212787
87.2	0.0212844
87.3	0.0212902
87.4	0.0212961
87.5	0.0213019
87.6	0.0213078
87.7	0.0213138
87.8	0.0213198
87.9	0.0213258
88	0.0213318
88.1	0.0213379
88.2	0.0213441
88.3	0.0213502
88.4	0.0213564
88.5	0.0213627
88.6	0.0213689
88.7	0.0213752
88.8	0.0213816
88.9	0.021388
89	0.0213944
89.1	0.0214009
89.2	0.0214074
89.3	0.0214139
89.4	0.0214204
89.5	0.021427
89.6	0.0214337
89.7	0.0214404
89.8	0.0214471
89.9	0.0214538
90	0.0214606
90.1	0.0214674
90.2	0.0214742
90.3	0.0214811
90.4	0.021488
90.5	0.021495
90.6	0.021502
90.7	0.021509
90.8	0.021516
90.9	0.0215231
91	0.0215302
91.1	0.0215374
91.2	0.0215446
91.3	0.0215518
91.4	0.0215591
91.5	0.0215664
91.6	0.0215737
91.7	0.0215811
91.8	0.0215885
91.9	0.0215959
92	0.0216033
92.1	0.0216108
92.2	0.0216184
92.3	0.0216259
92.4	0.0216335
92.5	0.0216412
92.6	0.0216488
92.7	0.0216565
92.8	0.0216642
92.9	0.021672
93	0.0216798
93.1	0.0216876
93.2	0.0216955
93.3	0.0217034
93.4	0.0217113
93.5	0.0217193
93.6	0.0217273
93.7	0.0217353
93.8	0.0217433
93.9	0.0217514
94	0.0217596
94.1	0.0217677
94.2	0.0217759
94.3	0.0217841
94.4	0.0217924
94.5	0.0218007
94.6	0.021809
94.7	0.0218173
94.8	0.0218257
94.9	0.0218341
95	0.0218426
95.1	0.0218511
95.2	0.0218596
95.3	0.0218681
95.4	0.0218767
95.5	0.0218853
95.6	0.021894
95.7	0.0219026
95.8	0.0219113
95.9	0.0219201
96	0.0219288
96.1	0.0219376
96.2	0.0219465
96.3	0.0219553
96.4	0.0219642
96.5	0.0219732
96.6	0.0219821
96.7	0.0219911
96.8	0.0220002
96.9	0.0220092
97	0.0220183
97.1	0.0220274
97.2	0.0220366
97.3	0.0220458
97.4	0.022055
97.5	0.0220643
97.6	0.0220736
97.7	0.0220829
97.8	0.0220922
97.9	0.0221016
98	0.022111
98.1	0.0221205
98.2	0.0221299
98.3	0.0221395
98.4	0.022149
98.5	0.0221586
98.6	0.0221682
98.7	0.0221778
98.8	0.0221875
98.9	0.0221972
99	0.022207
99.1	0.0222167
99.2	0.0222265
99.3	0.0222364
99.4	0.0222462
99.5	0.0222561
99.6	0.0222661
99.7	0.022276
99.8	0.022286
99.9	0.0222961
100	0.0223061
100.1	0.0223162
100.2	0.0223264
100.3	0.0223365
100.4	0.0223467
100.5	0.022357
100.6	0.0223672
100.7	0.0223775
100.8	0.0223879
100.9	0.0223982
101	0.0224086
101.1	0.0224191
101.2	0.0224295
101.3	0.02244
101.4	0.0224505
101.5	0.0224611
101.6	0.0224717
101.7	0.0224823
101.8	0.022493
101.9	0.0225037
102	0.0225145
102.1	0.0225252
102.2	0.022536
102.3	0.0225469
102.4	0.0225577
102.5	0.0225686
102.6	0.0225796
102.7	0.0225906
102.8	0.0226016
102.9	0.0226126
103	0.0226237
103.1	0.0226348
103.2	0.022646
103.3	0.0226572
103.4	0.0226684
103.5	0.0226796
103.6	0.0226909
103.7	0.0227022
103.8	0.0227136
103.9	0.022725
104	0.0227364
104.1	0.0227479
104.2	0.0227594
104.3	0.022771
104.4	0.0227825
104.5	0.0227942
104.6	0.0228058
104.7	0.0228175
104.8	0.0228292
104.9	0.022841
105	0.0228528
105.1	0.0228646
105.2	0.0228765
105.3	0.0228884
105.4	0.0229004
105.5	0.0229124
105.6	0.0229244
105.7	0.0229364
105.8	0.0229485
105.9	0.0229607
106	0.0229729
106.1	0.0229851
106.2	0.0229973
106.3	0.0230096
106.4	0.023022
106.5	0.0230343
106.6	0.0230468
106.7	0.0230592
106.8	0.0230717
106.9	0.0230842
107	0.0230968
107.1	0.0231094
107.2	0.0231221
107.3	0.0231348
107.4	0.0231475
107.5	0.0231603
107.6	0.0231731
107.7	0.0231859
107.8	0.0231988
107.9	0.0232118
108	0.0232248
108.1	0.0232378
108.2	0.0232509
108.3	0.023264
108.4	0.0232771
108.5	0.0232903
108.6	0.0233036
108.7	0.0233168
108.8	0.0233302
108.9	0.0233435
109	0.023357
109.1	0.0233704
109.2	0.0233839
109.3	0.0233975
109.4	0.0234111
109.5	0.0234247
109.6	0.0234384
109.7	0.0234521
109.8	0.0234659
109.9	0.0234797
110	0.0234936
110.1	0.0235075
110.2	0.0235215
110.3	0.0235355
110.4	0.0235495
110.5	0.0235636
110.6	0.0235778
110.7	0.023592
110.8	0.0236063
110.9	0.0236206
111	0.0236349
111.1	0.0236493
111.2	0.0236638
111.3	0.0236783
111.4	0.0236928
111.5	0.0237074
111.6	0.0237221
111.7	0.0237368
111.8	0.0237515
111.9	0.0237664
112	0.0237812
112.1	0.0237961
112.2	0.0238111
112.3	0.0238261
112.4	0.0238412
112.5	0.0238564
112.6	0.0238715
112.7	0.0238868
112.8	0.0239021
112.9	0.0239174
113	0.0239329
113.1	0.0239483
113.2	0.0239638
113.3	0.0239794
113.4	0.0239951
113.5	0.0240108
113.6	0.0240265
113.7	0.0240424
113.8	0.0240582
113.9	0.0240742
114	0.0240902
114.1	0.0241062
114.2	0.0241224
114.3	0.0241385
114.4	0.0241548
114.5	0.0241711
114.6	0.0241875
114.7	0.0242039
114.8	0.0242204
114.9	0.024237
115	0.0242536
115.1	0.0242703
115.2	0.0242871
115.3	0.0243039
115.4	0.0243208
115.5	0.0243377
115.6	0.0243548
115.7	0.0243719
115.8	0.0243891
115.9	0.0244063
116	0.0244236
116.1	0.024441
116.2	0.0244584
116.3	0.024476
116.4	0.0244936
116.5	0.0245112
116.6	0.024529
116.7	0.0245468
116.8	0.0245647
116.9	0.0245827
117	0.0246007
117.1	0.0246189
117.2	0.0246371
117.3	0.0246553
117.4	0.0246737
117.5	0.0246921
117.6	0.0247107
117.7	0.0247293
117.8	0.0247479
117.9	0.0247667
118	0.0247855
118.1	0.0248045
118.2	0.0248235
118.3	0.0248426
118.4	0.0248617
118.5	0.024881
118.6	0.0249004
118.7	0.0249198
118.8	0.0249393
118.9	0.0249589
119	0.0249786
119.1	0.0249984
119.2	0.0250183
119.3	0.0250383
119.4	0.0250583
119.5	0.0250785
119.6	0.0250987
119.7	0.0251191
119.8	0.0251395
119.9	0.02516
120	0.0251807
120.1	0.0252014
120.2	0.0252222
120.3	0.0252431
120.4	0.0252641
120.5	0.0252852
120.6	0.0253064
120.7	0.0253277
120.8	0.0253491
120.9	0.0253706
121	0.0253922
121.1	0.0254139
121.2	0.0254357
121.3	0.0254576
121.4	0.0254796
121.5	0.0255018
121.6	0.025524
121.7	0.0255463
121.8	0.0255687
121.9	0.0255912
122	0.0256139
122.1	0.0256366
122.2	0.0256595
122.3	0.0256824
122.4	0.0257055
122.5	0.0257286
122.6	0.0257519
122.7	0.0257753
122.8	0.0257988
122.9	0.0258224
123	0.0258461
123.1	0.0258699
123.2	0.0258938
123.3	0.0259178
123.4	0.025942
123.5	0.0259662
123.6	0.0259905
123.7	0.026015
123.8	0.0260396
123.9	0.0260642
124	0.026089
124.1	0.0261139
124.2	0.0261389
124.3	0.026164
124.4	0.0261892
124.5	0.0262145
124.6	0.0262399
124.7	0.0262654
124.8	0.0262911
124.9	0.0263168
125	0.0263426
125.1	0.0263686
125.2	0.0263946
125.3	0.0264207
125.4	0.026447
125.5	0.0264733
125.6	0.0264997
125.7	0.0265263
125.8	0.0265529
125.9	0.0265797
126	0.0266065
126.1	0.0266334
126.2	0.0266604
126.3	0.0266876
126.4	0.0267148
126.5	0.0267421
126.6	0.0267695
126.7	0.0267969
126.8	0.0268245
126.9	0.0268522
127	0.0268799
127.1	0.0269078
127.2	0.0269357
127.3	0.0269637
127.4	0.0269918
127.5	0.02702
127.6	0.0270482
127.7	0.0270766
127.8	0.027105
127.9	0.0271335
128	0.0271621
128.1	0.0271908
128.2	0.0272195
[truncated: 30,966 more rows]

## Sheet: D4
Wave number (cm-1)	D4 Absorbance
-87.8	0.0167424
-87.7	0.0167472
-87.6	0.0167521
-87.5	0.016757
-87.4	0.0167619
-87.3	0.0167668
-87.2	0.0167716
-87.1	0.0167765
-87	0.0167814
-86.9	0.0167863
-86.8	0.0167912
-86.7	0.0167961
-86.6	0.0168011
-86.5	0.016806
-86.4	0.0168109
-86.3	0.0168158
-86.2	0.0168207
-86.1	0.0168257
-86	0.0168306
-85.9	0.0168355
-85.8	0.0168405
-85.7	0.0168454
-85.6	0.0168504
-85.5	0.0168553
-85.4	0.0168603
-85.3	0.0168652
-85.2	0.0168702
-85.1	0.0168752
-85	0.0168801
-84.9	0.0168851
-84.8	0.0168901
-84.7	0.0168951
-84.6	0.0169
-84.5	0.016905
-84.4	0.01691
-84.3	0.016915
-84.2	0.01692
-84.1	0.016925
-84	0.01693
-83.9	0.016935
-83.8	0.0169401
-83.7	0.0169451
-83.6	0.0169501
-83.5	0.0169551
-83.4	0.0169601
-83.3	0.0169652
-83.2	0.0169702
-83.1	0.0169753
-83	0.0169803
-82.9	0.0169853
-82.8	0.0169904
-82.7	0.0169954
-82.6	0.0170005
-82.5	0.0170056
-82.4	0.0170106
-82.3	0.0170157
-82.2	0.0170208
-82.1	0.0170259
-82	0.0170309
-81.9	0.017036
-81.8	0.0170411
-81.7	0.0170462
-81.6	0.0170513
-81.5	0.0170564
-81.4	0.0170615
-81.3	0.0170666
-81.2	0.0170717
-81.1	0.0170769
-81	0.017082
-80.9	0.0170871
-80.8	0.0170922
-80.7	0.0170974
-80.6	0.0171025
-80.5	0.0171077
-80.4	0.0171128
-80.3	0.0171179
-80.2	0.0171231
-80.1	0.0171283
-80	0.0171334
-79.9	0.0171386
-79.8	0.0171438
-79.7	0.0171489
-79.6	0.0171541
-79.5	0.0171593
-79.4	0.0171645
-79.3	0.0171697
-79.2	0.0171749
-79.1	0.0171801
-79	0.0171853
-78.9	0.0171905
-78.8	0.0171957
-78.7	0.0172009
-78.6	0.0172061
-78.5	0.0172113
-78.4	0.0172166
-78.3	0.0172218
-78.2	0.017227
-78.1	0.0172323
-78	0.0172375
-77.9	0.0172428
-77.8	0.017248
-77.7	0.0172533
-77.6	0.0172585
-77.5	0.0172638
-77.4	0.0172691
-77.3	0.0172743
-77.2	0.0172796
-77.1	0.0172849
-77	0.0172902
-76.9	0.0172955
-76.8	0.0173008
-76.7	0.0173061
-76.6	0.0173114
-76.5	0.0173167
-76.4	0.017322
-76.3	0.0173273
-76.2	0.0173326
-76.1	0.017338
-76	0.0173433
-75.9	0.0173486
-75.8	0.017354
-75.7	0.0173593
-75.6	0.0173646
-75.5	0.01737
-75.4	0.0173754
-75.3	0.0173807
-75.2	0.0173861
-75.1	0.0173915
-75	0.0173968
-74.9	0.0174022
-74.8	0.0174076
-74.7	0.017413
-74.6	0.0174184
-74.5	0.0174238
-74.4	0.0174292
-74.3	0.0174346
-74.2	0.01744
-74.1	0.0174454
-74	0.0174508
-73.9	0.0174562
-73.8	0.0174617
-73.7	0.0174671
-73.6	0.0174725
-73.5	0.017478
-73.4	0.0174834
-73.3	0.0174889
-73.2	0.0174943
-73.1	0.0174998
-73	0.0175053
-72.9	0.0175107
-72.8	0.0175162
-72.7	0.0175217
-72.6	0.0175272
-72.5	0.0175327
-72.4	0.0175382
-72.3	0.0175437
-72.2	0.0175492
-72.1	0.0175547
-72	0.0175602
-71.9	0.0175657
-71.8	0.0175712
-71.7	0.0175768
-71.6	0.0175823
-71.5	0.0175878
-71.4	0.0175934
-71.3	0.0175989
-71.2	0.0176045
-71.1	0.01761
-71	0.0176156
-70.9	0.0176212
-70.8	0.0176267
-70.7	0.0176323
-70.6	0.0176379
-70.5	0.0176435
-70.4	0.0176491
-70.3	0.0176547
-70.2	0.0176603
-70.1	0.0176659
-70	0.0176715
-69.9	0.0176771
-69.8	0.0176827
-69.7	0.0176884
-69.6	0.017694
-69.5	0.0176996
-69.4	0.0177053
-69.3	0.0177109
-69.2	0.0177166
-69.1	0.0177222
-69	0.0177279
-68.9	0.0177336
-68.8	0.0177392
-68.7	0.0177449
-68.6	0.0177506
-68.5	0.0177563
-68.4	0.017762
-68.3	0.0177677
-68.2	0.0177734
-68.1	0.0177791
-68	0.0177848
-67.9	0.0177905
-67.8	0.0177962
-67.7	0.017802
-67.6	0.0178077
-67.5	0.0178135
-67.4	0.0178192
-67.3	0.017825
-67.2	0.0178307
-67.1	0.0178365
-67	0.0178422
-66.9	0.017848
-66.8	0.0178538
-66.7	0.0178596
-66.6	0.0178654
-66.5	0.0178712
-66.4	0.017877
-66.3	0.0178828
-66.2	0.0178886
-66.1	0.0178944
-66	0.0179002
-65.9	0.0179061
-65.8	0.0179119
-65.7	0.0179177
-65.6	0.0179236
-65.5	0.0179294
-65.4	0.0179353
-65.3	0.0179411
-65.2	0.017947
-65.1	0.0179529
-65	0.0179588
-64.9	0.0179647
-64.8	0.0179705
-64.7	0.0179764
-64.6	0.0179823
-64.5	0.0179883
-64.4	0.0179942
-64.3	0.0180001
-64.2	0.018006
-64.1	0.0180119
-64	0.0180179
-63.9	0.0180238
-63.8	0.0180298
-63.7	0.0180357
-63.6	0.0180417
-63.5	0.0180477
-63.4	0.0180536
-63.3	0.0180596
-63.2	0.0180656
-63.1	0.0180716
-63	0.0180776
-62.9	0.0180836
-62.8	0.0180896
-62.7	0.0180956
-62.6	0.0181016
-62.5	0.0181077
-62.4	0.0181137
-62.3	0.0181197
-62.2	0.0181258
-62.1	0.0181318
-62	0.0181379
-61.9	0.018144
-61.8	0.01815
-61.7	0.0181561
-61.6	0.0181622
-61.5	0.0181683
-61.4	0.0181744
-61.3	0.0181805
-61.2	0.0181866
-61.1	0.0181927
-61	0.0181988
-60.9	0.0182049
-60.8	0.0182111
-60.7	0.0182172
-60.6	0.0182234
-60.5	0.0182295
-60.4	0.0182357
-60.3	0.0182418
-60.2	0.018248
-60.1	0.0182542
-60	0.0182604
-59.9	0.0182666
-59.8	0.0182728
-59.7	0.018279
-59.6	0.0182852
-59.5	0.0182914
-59.4	0.0182976
-59.3	0.0183039
-59.2	0.0183101
-59.1	0.0183164
-59	0.0183226
-58.9	0.0183289
-58.8	0.0183351
-58.7	0.0183414
-58.6	0.0183477
-58.5	0.018354
-58.4	0.0183603
-58.3	0.0183666
-58.2	0.0183729
-58.1	0.0183792
-58	0.0183855
-57.9	0.0183918
-57.8	0.0183982
-57.7	0.0184045
-57.6	0.0184109
-57.5	0.0184172
-57.4	0.0184236
-57.3	0.0184299
-57.2	0.0184363
-57.1	0.0184427
-57	0.0184491
-56.9	0.0184555
-56.8	0.0184619
-56.7	0.0184683
-56.6	0.0184747
-56.5	0.0184812
-56.4	0.0184876
-56.3	0.018494
-56.2	0.0185005
-56.1	0.0185069
-56	0.0185134
-55.9	0.0185199
-55.8	0.0185264
-55.7	0.0185328
-55.6	0.0185393
-55.5	0.0185458
-55.4	0.0185524
-55.3	0.0185589
-55.2	0.0185654
-55.1	0.0185719
-55	0.0185785
-54.9	0.018585
-54.8	0.0185916
-54.7	0.0185981
-54.6	0.0186047
-54.5	0.0186113
-54.4	0.0186179
-54.3	0.0186245
-54.2	0.0186311
-54.1	0.0186377
-54	0.0186443
-53.9	0.0186509
-53.8	0.0186575
-53.7	0.0186642
-53.6	0.0186708
-53.5	0.0186775
-53.4	0.0186842
-53.3	0.0186908
-53.2	0.0186975
-53.1	0.0187042
-53	0.0187109
-52.9	0.0187176
-52.8	0.0187243
-52.7	0.018731
-52.6	0.0187378
-52.5	0.0187445
-52.4	0.0187513
-52.3	0.018758
-52.2	0.0187648
-52.1	0.0187715
-52	0.0187783
-51.9	0.0187851
-51.8	0.0187919
-51.7	0.0187987
-51.6	0.0188055
-51.5	0.0188124
-51.4	0.0188192
-51.3	0.018826
-51.2	0.0188329
-51.1	0.0188397
-51	0.0188466
-50.9	0.0188535
-50.8	0.0188604
-50.7	0.0188673
-50.6	0.0188742
-50.5	0.0188811
-50.4	0.018888
-50.3	0.0188949
-50.2	0.0189018
-50.1	0.0189088
-50	0.0189157
-49.9	0.0189227
-49.8	0.0189297
-49.7	0.0189367
-49.6	0.0189437
-49.5	0.0189507
-49.4	0.0189577
-49.3	0.0189647
-49.2	0.0189717
-49.1	0.0189788
-49	0.0189858
-48.9	0.0189929
-48.8	0.0189999
-48.7	0.019007
-48.6	0.0190141
-48.5	0.0190212
-48.4	0.0190283
-48.3	0.0190354
-48.2	0.0190425
-48.1	0.0190497
-48	0.0190568
-47.9	0.019064
-47.8	0.0190711
-47.7	0.0190783
-47.6	0.0190855
-47.5	0.0190927
-47.4	0.0190999
-47.3	0.0191071
-47.2	0.0191143
-47.1	0.0191215
-47	0.0191288
-46.9	0.019136
-46.8	0.0191433
-46.7	0.0191506
-46.6	0.0191579
-46.5	0.0191651
-46.4	0.0191725
-46.3	0.0191798
-46.2	0.0191871
-46.1	0.0191944
-46	0.0192018
-45.9	0.0192091
-45.8	0.0192165
-45.7	0.0192239
-45.6	0.0192313
-45.5	0.0192387
-45.4	0.0192461
-45.3	0.0192535
-45.2	0.0192609
-45.1	0.0192684
-45	0.0192758
-44.9	0.0192833
-44.8	0.0192908
-44.7	0.0192982
-44.6	0.0193057
-44.5	0.0193132
-44.4	0.0193208
-44.3	0.0193283
-44.2	0.0193358
-44.1	0.0193434
-44	0.019351
-43.9	0.0193585
-43.8	0.0193661
-43.7	0.0193737
-43.6	0.0193813
-43.5	0.0193889
-43.4	0.0193966
-43.3	0.0194042
-43.2	0.0194119
-43.1	0.0194196
-43	0.0194272
-42.9	0.0194349
-42.8	0.0194426
-42.7	0.0194503
-42.6	0.0194581
-42.5	0.0194658
-42.4	0.0194736
-42.3	0.0194813
-42.2	0.0194891
-42.1	0.0194969
-42	0.0195047
-41.9	0.0195125
-41.8	0.0195203
-41.7	0.0195282
-41.6	0.019536
-41.5	0.0195439
-41.4	0.0195518
-41.3	0.0195597
-41.2	0.0195676
-41.1	0.0195755
-41	0.0195834
-40.9	0.0195914
-40.8	0.0195993
-40.7	0.0196073
-40.6	0.0196153
-40.5	0.0196233
-40.4	0.0196313
-40.3	0.0196393
-40.2	0.0196473
-40.1	0.0196554
-40	0.0196634
-39.9	0.0196715
-39.8	0.0196796
-39.7	0.0196877
-39.6	0.0196958
-39.5	0.0197039
-39.4	0.0197121
-39.3	0.0197202
-39.2	0.0197284
-39.1	0.0197366
-39	0.0197448
-38.9	0.019753
-38.8	0.0197612
-38.7	0.0197695
-38.6	0.0197777
-38.5	0.019786
-38.4	0.0197943
-38.3	0.0198026
-38.2	0.0198109
-38.1	0.0198192
-38	0.0198276
-37.9	0.0198359
-37.8	0.0198443
-37.7	0.0198527
-37.6	0.0198611
-37.5	0.0198695
-37.4	0.0198779
-37.3	0.0198864
-37.2	0.0198948
-37.1	0.0199033
-37	0.0199118
-36.9	0.0199203
-36.8	0.0199289
-36.7	0.0199374
-36.6	0.019946
-36.5	0.0199545
-36.4	0.0199631
-36.3	0.0199717
-36.2	0.0199803
-36.1	0.019989
-36	0.0199976
-35.9	0.0200063
-35.8	0.020015
-35.7	0.0200237
-35.6	0.0200324
-35.5	0.0200411
-35.4	0.0200499
-35.3	0.0200587
-35.2	0.0200675
-35.1	0.0200763
-35	0.0200851
-34.9	0.0200939
-34.8	0.0201028
-34.7	0.0201116
-34.6	0.0201205
-34.5	0.0201294
-34.4	0.0201384
-34.3	0.0201473
-34.2	0.0201563
-34.1	0.0201652
-34	0.0201742
-33.9	0.0201833
-33.8	0.0201923
-33.7	0.0202013
-33.6	0.0202104
-33.5	0.0202195
-33.4	0.0202286
-33.3	0.0202377
-33.2	0.0202469
-33.1	0.020256
-33	0.0202652
-32.9	0.0202744
-32.8	0.0202836
-32.7	0.0202929
-32.6	0.0203021
-32.5	0.0203114
-32.4	0.0203207
-32.3	0.02033
-32.2	0.0203393
-32.1	0.0203487
-32	0.0203581
-31.9	0.0203675
-31.8	0.0203769
-31.7	0.0203863
-31.6	0.0203958
-31.5	0.0204052
-31.4	0.0204147
-31.3	0.0204243
-31.2	0.0204338
-31.1	0.0204434
-31	0.0204529
-30.9	0.0204625
-30.8	0.0204722
-30.7	0.0204818
-30.6	0.0204915
-30.5	0.0205012
-30.4	0.0205109
-30.3	0.0205206
-30.2	0.0205303
-30.1	0.0205401
-30	0.0205499
-29.9	0.0205597
-29.8	0.0205696
-29.7	0.0205794
-29.6	0.0205893
-29.5	0.0205992
-29.4	0.0206092
-29.3	0.0206191
-29.2	0.0206291
-29.1	0.0206391
-29	0.0206491
-28.9	0.0206592
-28.8	0.0206693
-28.7	0.0206794
-28.6	0.0206895
-28.5	0.0206996
-28.4	0.0207098
-28.3	0.02072
-28.2	0.0207302
-28.1	0.0207405
-28	0.0207507
-27.9	0.020761
-27.8	0.0207714
-27.7	0.0207817
-27.6	0.0207921
-27.5	0.0208025
-27.4	0.0208129
-27.3	0.0208233
-27.2	0.0208338
-27.1	0.0208443
-27	0.0208548
-26.9	0.0208654
-26.8	0.020876
-26.7	0.0208866
-26.6	0.0208972
-26.5	0.0209079
-26.4	0.0209186
-26.3	0.0209293
-26.2	0.02094
-26.1	0.0209508
-26	0.0209616
-25.9	0.0209724
-25.8	0.0209833
-25.7	0.0209942
-25.6	0.0210051
-25.5	0.0210161
-25.4	0.021027
-25.3	0.021038
-25.2	0.0210491
-25.1	0.0210601
-25	0.0210712
-24.9	0.0210824
-24.8	0.0210935
-24.7	0.0211047
-24.6	0.0211159
-24.5	0.0211272
-24.4	0.0211384
-24.3	0.0211497
-24.2	0.0211611
-24.1	0.0211725
-24	0.0211839
-23.9	0.0211953
-23.8	0.0212068
-23.7	0.0212183
-23.6	0.0212298
-23.5	0.0212414
-23.4	0.021253
-23.3	0.0212646
-23.2	0.0212763
-23.1	0.021288
-23	0.0212997
-22.9	0.0213115
-22.8	0.0213233
-22.7	0.0213352
-22.6	0.021347
-22.5	0.021359
-22.4	0.0213709
-22.3	0.0213829
-22.2	0.0213949
-22.1	0.021407
-22	0.0214191
-21.9	0.0214312
-21.8	0.0214434
-21.7	0.0214556
-21.6	0.0214678
-21.5	0.0214801
-21.4	0.0214924
-21.3	0.0215048
-21.2	0.0215172
-21.1	0.0215296
-21	0.0215421
-20.9	0.0215546
-20.8	0.0215671
-20.7	0.0215797
-20.6	0.0215924
-20.5	0.021605
-20.4	0.0216178
-20.3	0.0216305
-20.2	0.0216433
-20.1	0.0216562
-20	0.021669
-19.9	0.021682
-19.8	0.0216949
-19.7	0.021708
-19.6	0.021721
-19.5	0.0217341
-19.4	0.0217473
-19.3	0.0217604
-19.2	0.0217737
-19.1	0.021787
-19	0.0218003
-18.9	0.0218137
-18.8	0.0218271
-18.7	0.0218405
-18.6	0.021854
-18.5	0.0218676
-18.4	0.0218812
-18.3	0.0218949
-18.2	0.0219086
-18.1	0.0219223
-18	0.0219361
-17.9	0.02195
-17.8	0.0219639
-17.7	0.0219778
-17.6	0.0219918
-17.5	0.0220059
-17.4	0.02202
-17.3	0.0220341
-17.2	0.0220483
-17.1	0.0220626
-17	0.0220769
-16.9	0.0220913
-16.8	0.0221057
-16.7	0.0221202
-16.6	0.0221347
-16.5	0.0221493
-16.4	0.0221639
-16.3	0.0221786
-16.2	0.0221934
-16.1	0.0222082
-16	0.0222231
-15.9	0.022238
-15.8	0.022253
-15.7	0.022268
-15.6	0.0222831
-15.5	0.0222983
-15.4	0.0223135
-15.3	0.0223288
-15.2	0.0223441
-15.1	0.0223595
-15	0.022375
-14.9	0.0223905
-14.8	0.0224061
-14.7	0.0224218
-14.6	0.0224375
-14.5	0.0224533
-14.4	0.0224692
-14.3	0.0224851
-14.2	0.0225011
-14.1	0.0225172
-14	0.0225333
-13.9	0.0225495
-13.8	0.0225657
-13.7	0.0225821
-13.6	0.0225985
-13.5	0.022615
-13.4	0.0226315
-13.3	0.0226481
-13.2	0.0226648
-13.1	0.0226816
-13	0.0226984
-12.9	0.0227153
-12.8	0.0227323
-12.7	0.0227494
-12.6	0.0227666
-12.5	0.0227838
-12.4	0.0228011
-12.3	0.0228185
-12.2	0.0228359
-12.1	0.0228535
-12	0.0228711
-11.9	0.0228888
-11.8	0.0229066
-11.7	0.0229244
-11.6	0.0229424
-11.5	0.0229604
-11.4	0.0229786
-11.3	0.0229968
-11.2	0.0230151
-11.1	0.0230335
-11	0.023052
-10.9	0.0230705
-10.8	0.0230892
-10.7	0.0231079
-10.6	0.0231268
-10.5	0.0231457
-10.4	0.0231647
-10.3	0.0231839
-10.2	0.0232031
-10.1	0.0232224
-10	0.0232418
-9.9	0.0232614
-9.8	0.023281
-9.7	0.0233007
-9.6	0.0233205
-9.5	0.0233404
-9.4	0.0233605
-9.3	0.0233806
-9.2	0.0234008
-9.1	0.0234212
-9	0.0234416
-8.9	0.0234622
-8.8	0.0234829
-8.7	0.0235036
-8.6	0.0235245
-8.5	0.0235456
-8.4	0.0235667
-8.3	0.0235879
-8.2	0.0236093
-8.1	0.0236307
-8	0.0236523
-7.9	0.0236741
-7.8	0.0236959
-7.7	0.0237179
-7.6	0.0237399
-7.5	0.0237622
-7.4	0.0237845
-7.3	0.023807
-7.2	0.0238295
-7.1	0.0238523
-7	0.0238751
-6.9	0.0238981
-6.8	0.0239212
-6.7	0.0239445
-6.6	0.0239679
-6.5	0.0239914
-6.4	0.0240151
-6.3	0.0240389
-6.2	0.0240629
-6.1	0.024087
-6	0.0241113
-5.9	0.0241357
-5.8	0.0241602
-5.7	0.0241849
-5.6	0.0242098
-5.5	0.0242348
-5.4	0.02426
-5.3	0.0242853
-5.2	0.0243108
-5.1	0.0243364
-5	0.0243622
-4.9	0.0243882
-4.8	0.0244143
-4.7	0.0244406
-4.6	0.0244671
-4.5	0.0244938
-4.4	0.0245206
-4.3	0.0245476
-4.2	0.0245748
-4.1	0.0246021
-4	0.0246296
-3.9	0.0246574
-3.8	0.0246852
-3.7	0.0247133
-3.6	0.0247416
-3.5	0.0247701
-3.4	0.0247987
-3.3	0.0248276
-3.2	0.0248566
-3.1	0.0248859
-3	0.0249153
-2.9	0.024945
-2.8	0.0249748
-2.7	0.0250049
-2.6	0.0250352
-2.5	0.0250656
-2.4	0.0250963
-2.3	0.0251272
-2.2	0.0251584
-2.1	0.0251897
-2	0.0252213
-1.9	0.0252531
-1.8	0.0252851
-1.7	0.0253174
-1.6	0.0253499
-1.5	0.0253826
-1.4	0.0254155
-1.3	0.0254487
-1.2	0.0254822
-1.1	0.0255158
-1	0.0255498
-0.9	0.0255839
-0.8	0.0256184
-0.7	0.025653
-0.6	0.025688
-0.5	0.0257232
-0.4	0.0257586
-0.3	0.0257943
-0.2	0.0258303
-0.1	0.0258666
0	0.0259031
0.1	0.0259399
0.2	0.0259769
0.3	0.0260143
0.4	0.0260519
0.5	0.0260898
0.6	0.026128
0.7	0.0261665
0.8	0.0262052
0.9	0.0262443
1	0.0262836
1.1	0.0263233
1.2	0.0263632
1.3	0.0264035
1.4	0.026444
1.5	0.0264849
1.6	0.0265261
1.7	0.0265675
1.8	0.0266093
1.9	0.0266514
2	0.0266938
2.1	0.0267365
2.2	0.0267796
2.3	0.026823
2.4	0.0268667
2.5	0.0269107
2.6	0.026955
2.7	0.0269997
2.8	0.0270447
2.9	0.02709
3	0.0271357
3.1	0.0271817
3.2	0.027228
3.3	0.0272746
3.4	0.0273216
3.5	0.0273689
3.6	0.0274166
3.7	0.0274646
3.8	0.0275129
3.9	0.0275616
4	0.0276106
4.1	0.02766
4.2	0.0277096
4.3	0.0277597
4.4	0.02781
4.5	0.0278607
4.6	0.0279117
4.7	0.027963
4.8	0.0280147
4.9	0.0280667
5	0.0281191
5.1	0.0281717
5.2	0.0282247
5.3	0.028278
5.4	0.0283316
5.5	0.0283855
5.6	0.0284398
5.7	0.0284943
5.8	0.0285492
5.9	0.0286043
6	0.0286598
6.1	0.0287155
6.2	0.0287715
6.3	0.0288278
6.4	0.0288844
6.5	0.0289412
6.6	0.0289984
6.7	0.0290557
6.8	0.0291133
6.9	0.0291712
7	0.0292293
7.1	0.0292877
7.2	0.0293462
7.3	0.029405
7.4	0.029464
7.5	0.0295232
7.6	0.0295826
7.7	0.0296421
7.8	0.0297019
7.9	0.0297618
8	0.0298219
8.1	0.0298821
8.2	0.0299424
8.3	0.0300029
8.4	0.0300635
8.5	0.0301243
8.6	0.0301851
8.7	0.030246
8.8	0.030307
8.9	0.0303681
9	0.0304292
9.1	0.0304904
9.2	0.0305516
9.3	0.0306129
9.4	0.0306741
9.5	0.0307354
9.6	0.0307967
9.7	0.0308581
9.8	0.0309193
9.9	0.0309806
10	0.0310419
10.1	0.0311031
10.2	0.0311642
10.3	0.0312254
10.4	0.0312864
10.5	0.0313474
10.6	0.0314083
10.7	0.0314692
10.8	0.03153
10.9	0.0315907
11	0.0316513
11.1	0.0317118
11.2	0.0317723
11.3	0.0318326
11.4	0.0318928
11.5	0.031953
11.6	0.0320131
11.7	0.032073
11.8	0.0321329
11.9	0.0321927
12	0.0322525
12.1	0.0323121
12.2	0.0323717
12.3	0.0324312
12.4	0.0324906
12.5	0.03255
12.6	0.0326094
12.7	0.0326687
12.8	0.032728
12.9	0.0327873
13	0.0328465
13.1	0.0329058
13.2	0.0329651
13.3	0.0330245
13.4	0.0330839
13.5	0.0331434
13.6	0.0332029
13.7	0.0332626
13.8	0.0333223
13.9	0.0333822
14	0.0334423
14.1	0.0335025
14.2	0.0335629
14.3	0.0336236
14.4	0.0336844
14.5	0.0337456
14.6	0.0338069
14.7	0.0338686
14.8	0.0339306
14.9	0.033993
15	0.0340556
15.1	0.0341187
15.2	0.0341822
15.3	0.0342461
15.4	0.0343105
15.5	0.0343754
15.6	0.0344407
15.7	0.0345066
15.8	0.034573
15.9	0.03464
16	0.0347076
16.1	0.0347758
16.2	0.0348446
16.3	0.0349141
16.4	0.0349844
16.5	0.0350553
16.6	0.0351269
16.7	0.0351994
16.8	0.0352726
16.9	0.0353466
17	0.0354215
17.1	0.0354972
17.2	0.0355738
17.3	0.0356513
17.4	0.0357297
17.5	0.0358091
17.6	0.0358894
17.7	0.0359708
17.8	0.0360531
17.9	0.0361365
18	0.0362209
18.1	0.0363065
18.2	0.0363931
18.3	0.0364808
18.4	0.0365697
18.5	0.0366598
18.6	0.036751
18.7	0.0368435
18.8	0.0369372
18.9	0.0370321
19	0.0371283
19.1	0.0372257
19.2	0.0373245
19.3	0.0374246
19.4	0.0375261
19.5	0.0376289
19.6	0.037733
19.7	0.0378386
19.8	0.0379456
19.9	0.0380541
20	0.038164
20.1	0.0382753
20.2	0.0383882
20.3	0.0385025
20.4	0.0386184
20.5	0.0387358
20.6	0.0388548
20.7	0.0389754
20.8	0.0390975
20.9	0.0392213
21	0.0393466
21.1	0.0394737
21.2	0.0396023
21.3	0.0397327
21.4	0.0398647
21.5	0.0399984
21.6	0.0401339
21.7	0.040271
21.8	0.04041
21.9	0.0405507
22	0.0406931
22.1	0.0408374
22.2	0.0409834
22.3	0.0411313
22.4	0.041281
22.5	0.0414325
22.6	0.0415859
22.7	0.0417411
22.8	0.0418983
22.9	0.0420573
23	0.0422182
23.1	0.0423811
23.2	0.0425458
23.3	0.0427125
23.4	0.0428811
23.5	0.0430517
23.6	0.0432242
23.7	0.0433987
23.8	0.0435752
23.9	0.0437537
24	0.0439341
24.1	0.0441166
24.2	0.044301
24.3	0.0444875
24.4	0.044676
24.5	0.0448665
24.6	0.045059
24.7	0.0452535
24.8	0.0454501
24.9	0.0456486
25	0.0458492
25.1	0.0460518
25.2	0.0462565
25.3	0.0464632
25.4	0.0466718
25.5	0.0468825
25.6	0.0470952
25.7	0.0473099
25.8	0.0475266
25.9	0.0477453
26	0.047966
26.1	0.0481886
26.2	0.0484132
26.3	0.0486397
26.4	0.0488681
26.5	0.0490985
26.6	0.0493307
26.7	0.0495649
26.8	0.0498008
26.9	0.0500386
27	0.0502783
27.1	0.0505197
27.2	0.0507628
27.3	0.0510077
27.4	0.0512543
27.5	0.0515026
27.6	0.0517525
27.7	0.052004
27.8	0.052257
27.9	0.0525116
28	0.0527677
28.1	0.0530252
28.2	0.0532841
28.3	0.0535443
28.4	0.0538059
28.5	0.0540687
28.6	0.0543327
28.7	0.0545979
28.8	0.0548641
28.9	0.0551313
29	0.0553996
29.1	0.0556687
29.2	0.0559387
29.3	0.0562094
29.4	0.0564808
29.5	0.0567529
29.6	0.0570255
29.7	0.0572986
29.8	0.0575722
29.9	0.057846
30	0.0581201
30.1	0.0583943
30.2	0.0586687
30.3	0.058943
30.4	0.0592172
30.5	0.0594913
30.6	0.059765
30.7	0.0600384
30.8	0.0603114
30.9	0.0605838
31	0.0608555
31.1	0.0611265
31.2	0.0613966
31.3	0.0616658
31.4	0.061934
31.5	0.062201
31.6	0.0624667
31.7	0.0627311
31.8	0.0629941
31.9	0.0632555
32	0.0635152
32.1	0.0637732
32.2	0.0640293
32.3	0.0642834
32.4	0.0645354
32.5	0.0647853
32.6	0.0650328
32.7	0.065278
32.8	0.0655206
32.9	0.0657606
33	0.0659979
33.1	0.0662324
33.2	0.0664639
33.3	0.0666924
33.4	0.0669178
33.5	0.0671399
33.6	0.0673586
33.7	0.0675739
33.8	0.0677856
33.9	0.0679937
34	0.068198
34.1	0.0683983
34.2	0.0685947
34.3	0.068787
34.4	0.0689751
34.5	0.0691589
34.6	0.0693383
34.7	0.0695132
34.8	0.0696834
34.9	0.069849
35	0.0700097
35.1	0.0701655
35.2	0.0703163
35.3	0.070462
35.4	0.0706025
35.5	0.0707376
35.6	0.0708673
35.7	0.0709915
35.8	0.0711101
35.9	0.071223
36	0.0713301
36.1	0.0714313
36.2	0.0715265
36.3	0.0716156
36.4	0.0716986
36.5	0.0717754
36.6	0.0718459
36.7	0.0719099
36.8	0.0719675
36.9	0.0720186
37	0.072063
37.1	0.0721008
37.2	0.0721319
37.3	0.0721561
37.4	0.0721736
37.5	0.0721841
37.6	0.0721877
37.7	0.0721843
37.8	0.072174
37.9	0.0721566
38	0.0721321
38.1	0.0721006
38.2	0.0720621
38.3	0.0720164
38.4	0.0719637
38.5	0.0719039
38.6	0.071837
38.7	0.0717631
38.8	0.0716822
38.9	0.0715944
39	0.0714996
39.1	0.0713979
39.2	0.0712894
39.3	0.0711742
39.4	0.0710522
39.5	0.0709237
39.6	0.0707885
39.7	0.070647
39.8	0.0704991
39.9	0.0703449
40	0.0701846
40.1	0.0700182
40.2	0.069846
40.3	0.0696679
40.4	0.0694841
40.5	0.0692948
40.6	0.0691001
40.7	0.0689001
40.8	0.068695
40.9	0.068485
41	0.0682701
41.1	0.0680505
41.2	0.0678265
41.3	0.0675981
41.4	0.0673655
41.5	0.0671289
41.6	0.0668884
41.7	0.0666443
41.8	0.0663966
41.9	0.0661455
42	0.0658913
42.1	0.0656341
42.2	0.065374
42.3	0.0651113
42.4	0.064846
42.5	0.0645784
42.6	0.0643086
42.7	0.0640368
42.8	0.0637631
42.9	0.0634878
43	0.0632109
43.1	0.0629326
43.2	0.0626531
43.3	0.0623726
43.4	0.0620911
43.5	0.0618088
43.6	0.0615258
43.7	0.0612424
43.8	0.0609586
43.9	0.0606745
44	0.0603904
44.1	0.0601062
44.2	0.0598222
44.3	0.0595384
44.4	0.059255
44.5	0.0589721
44.6	0.0586898
44.7	0.0584081
44.8	0.0581272
44.9	0.0578472
45	0.0575682
45.1	0.0572902
45.2	0.0570134
45.3	0.0567378
45.4	0.0564635
45.5	0.0561906
45.6	0.0559191
45.7	0.0556491
45.8	0.0553807
45.9	0.0551139
46	0.0548489
46.1	0.0545855
46.2	0.054324
46.3	0.0540642
46.4	0.0538064
46.5	0.0535505
46.6	0.0532966
46.7	0.0530446
46.8	0.0527947
46.9	0.0525469
47	0.0523011
47.1	0.0520575
47.2	0.051816
47.3	0.0515767
47.4	0.0513395
47.5	0.0511045
47.6	0.0508718
47.7	0.0506413
47.8	0.050413
47.9	0.0501869
48	0.0499631
48.1	0.0497415
48.2	0.0495222
48.3	0.0493052
48.4	0.0490904
48.5	0.0488779
48.6	0.0486676
48.7	0.0484596
48.8	0.0482539
48.9	0.0480503
49	0.0478491
49.1	0.04765
49.2	0.0474531
49.3	0.0472585
49.4	0.0470661
49.5	0.0468758
49.6	0.0466877
49.7	0.0465018
49.8	0.046318
49.9	0.0461364
50	0.0459568
50.1	0.0457793
50.2	0.045604
50.3	0.0454307
50.4	0.0452594
50.5	0.0450901
50.6	0.0449229
50.7	0.0447576
50.8	0.0445943
50.9	0.044433
51	0.0442735
51.1	0.044116
51.2	0.0439604
51.3	0.0438066
51.4	0.0436547
51.5	0.0435046
51.6	0.0433562
51.7	0.0432097
51.8	0.0430649
51.9	0.0429219
52	0.0427805
52.1	0.0426409
52.2	0.0425029
52.3	0.0423666
52.4	0.0422318
52.5	0.0420987
52.6	0.0419672
52.7	0.0418372
52.8	0.0417088
52.9	0.0415819
53	0.0414565
53.1	0.0413325
53.2	0.0412101
53.3	0.041089
53.4	0.0409694
53.5	0.0408512
53.6	0.0407343
53.7	0.0406188
53.8	0.0405046
53.9	0.0403918
54	0.0402802
54.1	0.04017
54.2	0.040061
54.3	0.0399532
54.4	0.0398467
54.5	0.0397414
54.6	0.0396372
54.7	0.0395343
54.8	0.0394325
54.9	0.0393319
55	0.0392324
55.1	0.039134
55.2	0.0390367
55.3	0.0389405
55.4	0.0388454
55.5	0.0387513
55.6	0.0386583
55.7	0.0385663
55.8	0.0384753
55.9	0.0383854
56	0.0382964
56.1	0.0382084
56.2	0.0381214
56.3	0.0380354
56.4	0.0379503
56.5	0.0378661
56.6	0.0377829
56.7	0.0377005
56.8	0.0376191
56.9	0.0375386
57	0.037459
57.1	0.0373802
57.2	0.0373023
57.3	0.0372253
57.4	0.0371491
57.5	0.0370738
57.6	0.0369993
57.7	0.0369256
57.8	0.0368527
57.9	0.0367807
58	0.0367094
58.1	0.036639
58.2	0.0365693
58.3	0.0365004
58.4	0.0364323
58.5	0.0363649
58.6	0.0362983
58.7	0.0362325
58.8	0.0361673
58.9	0.036103
59	0.0360393
59.1	0.0359764
59.2	0.0359142
59.3	0.0358527
59.4	0.0357919
59.5	0.0357318
59.6	0.0356723
59.7	0.0356136
59.8	0.0355556
59.9	0.0354982
60	0.0354414
60.1	0.0353854
60.2	0.03533
60.3	0.0352752
60.4	0.0352211
60.5	0.0351676
60.6	0.0351147
60.7	0.0350625
60.8	0.0350109
60.9	0.0349599
61	0.0349095
61.1	0.0348597
61.2	0.0348105
61.3	0.0347619
61.4	0.0347138
61.5	0.0346664
61.6	0.0346195
61.7	0.0345732
61.8	0.0345274
61.9	0.0344822
62	0.0344376
62.1	0.0343935
62.2	0.0343499
62.3	0.0343069
62.4	0.0342644
62.5	0.0342224
62.6	0.0341809
62.7	0.03414
62.8	0.0340996
62.9	0.0340596
63	0.0340202
63.1	0.0339813
63.2	0.0339428
63.3	0.0339048
63.4	0.0338673
63.5	0.0338303
63.6	0.0337938
63.7	0.0337577
63.8	0.0337221
63.9	0.0336869
64	0.0336522
64.1	0.0336179
64.2	0.0335841
64.3	0.0335507
64.4	0.0335177
64.5	0.0334852
64.6	0.033453
64.7	0.0334213
64.8	0.0333901
64.9	0.0333592
65	0.0333287
65.1	0.0332986
65.2	0.033269
65.3	0.0332397
65.4	0.0332108
65.5	0.0331823
65.6	0.0331542
65.7	0.0331264
65.8	0.033099
65.9	0.033072
66	0.0330454
66.1	0.0330191
66.2	0.0329931
66.3	0.0329676
66.4	0.0329423
66.5	0.0329174
66.6	0.0328929
66.7	0.0328687
66.8	0.0328448
66.9	0.0328213
67	0.0327981
67.1	0.0327752
67.2	0.0327526
67.3	0.0327304
67.4	0.0327085
67.5	0.0326868
67.6	0.0326655
67.7	0.0326445
67.8	0.0326238
67.9	0.0326034
68	0.0325833
68.1	0.0325635
68.2	0.0325439
68.3	0.0325247
68.4	0.0325057
68.5	0.032487
68.6	0.0324686
68.7	0.0324505
68.8	0.0324326
68.9	0.032415
69	0.0323977
69.1	0.0323806
69.2	0.0323638
69.3	0.0323473
69.4	0.032331
69.5	0.032315
69.6	0.0322992
69.7	0.0322836
69.8	0.0322683
69.9	0.0322533
70	0.0322385
70.1	0.0322239
70.2	0.0322096
70.3	0.0321954
70.4	0.0321816
70.5	0.0321679
70.6	0.0321545
70.7	0.0321413
70.8	0.0321283
70.9	0.0321156
71	0.032103
71.1	0.0320907
71.2	0.0320786
71.3	0.0320667
71.4	0.032055
71.5	0.0320435
71.6	0.0320322
71.7	0.0320211
71.8	0.0320102
71.9	0.0319996
72	0.0319891
72.1	0.0319788
72.2	0.0319687
72.3	0.0319588
72.4	0.0319491
72.5	0.0319396
72.6	0.0319302
72.7	0.0319211
72.8	0.0319121
72.9	0.0319033
73	0.0318947
73.1	0.0318862
73.2	0.031878
73.3	0.0318699
73.4	0.031862
73.5	0.0318542
73.6	0.0318467
73.7	0.0318393
73.8	0.031832
73.9	0.031825
74	0.031818
74.1	0.0318113
74.2	0.0318047
74.3	0.0317983
74.4	0.031792
74.5	0.0317859
74.6	0.0317799
74.7	0.0317741
74.8	0.0317685
74.9	0.031763
75	0.0317576
75.1	0.0317524
75.2	0.0317473
75.3	0.0317424
75.4	0.0317377
75.5	0.031733
75.6	0.0317285
75.7	0.0317242
75.8	0.03172
75.9	0.0317159
76	0.031712
76.1	0.0317082
76.2	0.0317045
76.3	0.031701
76.4	0.0316976
76.5	0.0316944
76.6	0.0316912
76.7	0.0316882
76.8	0.0316854
76.9	0.0316826
77	0.03168
77.1	0.0316775
77.2	0.0316751
77.3	0.0316729
77.4	0.0316707
77.5	0.0316687
77.6	0.0316669
77.7	0.0316651
77.8	0.0316634
77.9	0.0316619
78	0.0316605
78.1	0.0316592
78.2	0.031658
78.3	0.0316569
78.4	0.031656
78.5	0.0316551
78.6	0.0316544
78.7	0.0316538
78.8	0.0316533
78.9	0.0316529
79	0.0316526
79.1	0.0316524
79.2	0.0316523
79.3	0.0316523
79.4	0.0316524
79.5	0.0316527
79.6	0.031653
79.7	0.0316534
79.8	0.031654
79.9	0.0316546
80	0.0316553
80.1	0.0316562
80.2	0.0316571
80.3	0.0316581
80.4	0.0316593
80.5	0.0316605
80.6	0.0316618
80.7	0.0316632
80.8	0.0316648
80.9	0.0316664
81	0.0316681
81.1	0.0316699
81.2	0.0316717
81.3	0.0316737
81.4	0.0316758
81.5	0.0316779
81.6	0.0316802
81.7	0.0316825
81.8	0.0316849
81.9	0.0316875
82	0.0316901
82.1	0.0316927
82.2	0.0316955
82.3	0.0316984
82.4	0.0317013
82.5	0.0317043
82.6	0.0317075
82.7	0.0317107
82.8	0.0317139
82.9	0.0317173
83	0.0317207
83.1	0.0317243
83.2	0.0317279
83.3	0.0317315
83.4	0.0317353
83.5	0.0317392
83.6	0.0317431
83.7	0.0317471
83.8	0.0317512
83.9	0.0317553
84	0.0317595
84.1	0.0317639
84.2	0.0317682
84.3	0.0317727
84.4	0.0317772
84.5	0.0317819
84.6	0.0317865
84.7	0.0317913
84.8	0.0317961
84.9	0.031801
85	0.031806
85.1	0.0318111
85.2	0.0318162
85.3	0.0318214
85.4	0.0318267
85.5	0.031832
85.6	0.0318374
85.7	0.0318429
85.8	0.0318484
85.9	0.0318541
86	0.0318597
86.1	0.0318655
86.2	0.0318713
86.3	0.0318772
86.4	0.0318832
86.5	0.0318892
86.6	0.0318953
86.7	0.0319015
86.8	0.0319077
86.9	0.031914
87	0.0319203
87.1	0.0319268
87.2	0.0319333
87.3	0.0319398
87.4	0.0319464
87.5	0.0319531
87.6	0.0319598
87.7	0.0319667
87.8	0.0319735
87.9	0.0319805
88	0.0319875
88.1	0.0319945
88.2	0.0320016
88.3	0.0320088
88.4	0.0320161
88.5	0.0320234
88.6	0.0320307
88.7	0.0320382
88.8	0.0320457
88.9	0.0320532
89	0.0320608
89.1	0.0320685
89.2	0.0320762
89.3	0.032084
89.4	0.0320919
89.5	0.0320998
89.6	0.0321077
89.7	0.0321157
89.8	0.0321238
89.9	0.032132
90	0.0321402
90.1	0.0321484
90.2	0.0321567
90.3	0.0321651
90.4	0.0321735
90.5	0.032182
90.6	0.0321905
90.7	0.0321991
90.8	0.0322078
90.9	0.0322165
91	0.0322252
91.1	0.0322341
91.2	0.0322429
91.3	0.0322519
91.4	0.0322608
91.5	0.0322699
91.6	0.032279
91.7	0.0322881
91.8	0.0322973
91.9	0.0323066
92	0.0323159
92.1	0.0323253
92.2	0.0323347
92.3	0.0323441
92.4	0.0323537
92.5	0.0323632
92.6	0.0323729
92.7	0.0323825
92.8	0.0323923
92.9	0.0324021
93	0.0324119
93.1	0.0324218
93.2	0.0324317
93.3	0.0324417
93.4	0.0324518
93.5	0.0324619
93.6	0.032472
93.7	0.0324822
93.8	0.0324925
93.9	0.0325028
94	0.0325132
94.1	0.0325236
94.2	0.032534
94.3	0.0325445
94.4	0.0325551
94.5	0.0325657
94.6	0.0325764
94.7	0.0325871
94.8	0.0325979
94.9	0.0326087
95	0.0326195
95.1	0.0326305
95.2	0.0326414
95.3	0.0326524
95.4	0.0326635
95.5	0.0326746
95.6	0.0326858
95.7	0.032697
95.8	0.0327083
95.9	0.0327196
96	0.0327309
96.1	0.0327423
96.2	0.0327538
96.3	0.0327653
96.4	0.0327769
96.5	0.0327885
96.6	0.0328001
96.7	0.0328119
96.8	0.0328236
96.9	0.0328354
97	0.0328473
97.1	0.0328592
97.2	0.0328711
97.3	0.0328831
97.4	0.0328952
97.5	0.0329073
97.6	0.0329194
97.7	0.0329316
97.8	0.0329439
97.9	0.0329562
98	0.0329685
98.1	0.0329809
98.2	0.0329933
98.3	0.0330058
98.4	0.0330183
98.5	0.0330309
98.6	0.0330436
98.7	0.0330562
98.8	0.033069
98.9	0.0330817
99	0.0330946
99.1	0.0331074
99.2	0.0331204
99.3	0.0331333
99.4	0.0331464
99.5	0.0331594
99.6	0.0331726
99.7	0.0331857
99.8	0.0331989
99.9	0.0332122
100	0.0332255
100.1	0.0332389
100.2	0.0332523
100.3	0.0332657
100.4	0.0332792
100.5	0.0332928
100.6	0.0333064
100.7	0.03332
100.8	0.0333337
100.9	0.0333475
101	0.0333613
101.1	0.0333751
101.2	0.033389
101.3	0.033403
101.4	0.033417
101.5	0.033431
101.6	0.0334451
101.7	0.0334593
101.8	0.0334734
101.9	0.0334877
102	0.033502
102.1	0.0335163
102.2	0.0335307
102.3	0.0335451
102.4	0.0335596
102.5	0.0335742
102.6	0.0335888
102.7	0.0336034
102.8	0.0336181
102.9	0.0336328
103	0.0336476
103.1	0.0336624
103.2	0.0336773
103.3	0.0336923
103.4	0.0337073
103.5	0.0337223
103.6	0.0337374
103.7	0.0337525
103.8	0.0337677
103.9	0.033783
104	0.0337983
104.1	0.0338136
104.2	0.033829
104.3	0.0338445
104.4	0.03386
104.5	0.0338755
104.6	0.0338911
104.7	0.0339068
104.8	0.0339225
104.9	0.0339382
105	0.0339541
105.1	0.0339699
105.2	0.0339858
105.3	0.0340018
105.4	0.0340179
105.5	0.0340339
105.6	0.0340501
105.7	0.0340663
105.8	0.0340825
105.9	0.0340988
106	0.0341151
106.1	0.0341315
106.2	0.034148
106.3	0.0341645
106.4	0.0341811
106.5	0.0341977
106.6	0.0342144
106.7	0.0342311
106.8	0.0342479
106.9	0.0342648
107	0.0342817
107.1	0.0342986
107.2	0.0343156
107.3	0.0343327
107.4	0.0343498
107.5	0.034367
107.6	0.0343843
107.7	0.0344016
107.8	0.0344189
107.9	0.0344363
108	0.0344538
108.1	0.0344714
108.2	0.0344889
108.3	0.0345066
108.4	0.0345243
108.5	0.0345421
108.6	0.0345599
108.7	0.0345778
108.8	0.0345958
108.9	0.0346138
109	0.0346319
109.1	0.03465
109.2	0.0346682
109.3	0.0346865
109.4	0.0347048
109.5	0.0347232
109.6	0.0347416
109.7	0.0347601
109.8	0.0347787
109.9	0.0347974
110	0.0348161
110.1	0.0348348
110.2	0.0348537
110.3	0.0348726
110.4	0.0348915
110.5	0.0349106
110.6	0.0349297
110.7	0.0349488
110.8	0.0349681
110.9	0.0349874
111	0.0350068
111.1	0.0350262
111.2	0.0350457
111.3	0.0350653
111.4	0.0350849
111.5	0.0351047
111.6	0.0351244
111.7	0.0351443
111.8	0.0351642
111.9	0.0351842
112	0.0352043
[truncated: 31,154 more rows]

## Sheet: H2O
Wave number (cm-1)	H2O Absorbance
1500	0.413171
1505	0.466516
1510	0.530889
1515	0.60955
1520	0.707057
1525	0.829937
1530	0.987805
1535	1.19529
1540	1.47552
1545	1.8668
1550	2.43627
1555	3.31031
1560	4.7495
1565	7.36119
1570	12.8231
1575	27.0568
1580	78.2977
1585	184.433
1590	67.0689
1595	24.2508
1600	11.8484
1605	6.92518
1610	4.51998
1615	3.17544
1620	2.35056
1625	1.80903
1630	1.43477
1635	1.1655
1640	0.965375
1645	0.812631
1650	0.693428
1655	0.598627
1660	0.522
1665	0.459187
1670	0.407058
1675	0.363321
1680	0.326269
1685	0.294607
1690	0.267337
1695	0.243684
1700	0.223035
1705	0.204903
1710	0.188895
1715	0.174691
1720	0.162031
1725	0.150699
1730	0.140514
1735	0.131329
1740	0.123015
1745	0
1750	0
1755	0
1760	0
1765	0
1770	0
1775	0
1780	0
1785	0
1790	0
1795	0
1800	0
1805	0
1810	0
1815	0
1820	0
1825	0
1830	0
1835	0
1840	0
1845	0
1850	0
1855	0
1860	0
1865	0
1870	0
1875	0
1880	0
1885	0
1890	0
1895	0
1900	0
1905	0
1910	0
1915	0
1920	0
1925	0
1930	0
1935	0
1940	0
1945	0
1950	0
1955	0
1960	0
1965	0
1970	0
1975	0
1980	0
1985	0
1990	0
1995	0
2000	0
2005	0
2010	0
2015	0
2020	0
2025	0
2030	0
2035	0
2040	0
2045	0
2050	0
2055	0
2060	0
2065	0
2070	0
2075	0
2080	0
2085	0
2090	0
2095	0
2100	0
2105	0
2110	0
2115	0
2120	0
2125	0
2130	0
2135	0
2140	0
2145	0
2150	0
2155	0
2160	0
2165	0
2170	0
2175	0
2180	0
2185	0
2190	0
2195	0
2200	0
2205	0
2210	0
2215	0
2220	0
2225	0
2230	0
2235	0
2240	0
2245	0
2250	0
2255	0
2260	0
2265	0
2270	0
2275	0
2280	0
2285	0
2290	0
2295	0
2300	0
2305	0
2310	0
2315	0
2320	0
2325	0
2330	0
2335	0
2340	0
2345	0
2350	0
2355	0
2360	0
2365	0
2370	0
2375	0
2380	0
2385	0
2390	0
2395	0
2400	0
2405	0
2410	0
2415	0
2420	0
2425	0
2430	0
2435	0
2440	0
2445	0
2450	0
2455	0
2460	0
2465	0
2470	0
2475	0
2480	0
2485	0
2490	0
2495	0
2500	0
2505	0
2510	0
2515	0
2520	0
2525	0
2530	0
2535	0
2540	0
2545	0
2550	0
2555	0
2560	0
2565	0
2570	0
2575	0
2580	0
2585	0
2590	0
2595	0
2600	0
2605	0
2610	0
2615	0
2620	0
2625	0
2630	0
2635	0
2640	0
2645	0
2650	0
2655	0
2660	0
2665	0
2670	0
2675	0
2680	0
2685	0
2690	0
2695	0
2700	0
2705	0
2710	0
2715	0
2720	0
2725	0
2730	0
2735	0
2740	0
2745	0
2750	0
2755	0
2760	0
2765	0
2770	0
2775	0
2780	0
2785	0
2790	0
2795	0
2800	0
2805	0
2810	0
2815	0
2820	0
2825	0
2830	0
2835	0
2840	0
2845	0
2850	0
2855	0
2860	0
2865	0
2870	0
2875	0
2880	0
2885	0
2890	0
2895	0
2900	0
2905	0
2910	0
2915	0
2920	0
2925	0
2930	0
2935	0
2940	0
2945	0
2950	0
2955	0
2960	0
2965	0
2970	0
2975	0
2980	0
2985	0
2990	0
2995	0
3000	0
3005	0
3010	0
3015	0
3020	0
3025	0
3030	0
3035	0
3040	0
3045	0
3050	0
3055	0
3060	0
3065	0
3070	0
3075	0
3080	0
3085	0
3090	0
3095	0
3100	0
3105	0
3110	0
3115	0
3120	0
3125	0
3130	0
3135	0
3140	0
3145	0
3150	0
3155	0
3160	0
3165	0
3170	0
3175	0
3180	0
3185	0
3190	0
3195	0
3200	0
3205	0
3210	0
3215	0
3220	0
3225	0
3230	0
3235	0
3240	0
3245	0
3250	0
3255	0
3260	0
3265	0
3270	0
3275	0
3280	0
3285	0
3290	0
3295	0
3300	0
3305	0
3310	0
3315	0
3320	0
3325	0
3330	0
3335	0
3340	0
3345	0
3350	0
3355	0
3360	0
3365	0
3370	0
3375	0
3380	0
3385	0
3390	0
3395	0
3400	0
3405	0
3410	0
3415	0
3420	0
3425	0
3430	0
3435	0
3440	0
3445	0
3450	0
3455	0
3460	0
3465	0
3470	0
3475	0
3480	0
3485	0
3490	0
3495	0
3500	0
3505	0
3510	0.0104542
3515	0.0111465
3520	0.0119099
3525	0.0127545
3530	0.0136921
3535	0.0147371
3540	0.0159063
3545	0.0172204
3550	0.0187043
3555	0.0203884
3560	0.0223106
3565	0.0245179
3570	0.0270695
3575	0.0300409
3580	0.0335295
3585	0.0376624
3590	0.0426087
3595	0.0485964
3600	0.0559393
3605	0.12494
3610	0.140556
3615	0.159974
3620	0.184708
3625	0.217153
3630	0.261295
3635	0.324192
3640	0.419342
3645	0.575279
3650	0.860971
3655	1.47757
3660	3.19336
3665	9.75456
3670	14.2333
3675	4.57143
3680	1.95708
3685	1.15019
3690	0.832929
3695	0.698524
3700	0.65265
3705	0.661794
3710	0.715492
3715	0.815603
3720	0.974655
3725	1.21986
3730	1.60527
3735	2.24303
3740	3.39092
3745	5.7419
3750	11.6418
3755	31.8727
3760	89.4539
3765	39.2293
3770	13.4682
3775	6.35932
3780	3.64676
3785	2.35383
3790	1.64258
3795	1.21097
3800	0.92981
3805	0.736572
3810	0.598094
3815	0.495476
3820	0.417314
3825	0.356402
3830	0.297968
3835	0.259462
3840	0.227959
3845	0.20186
3850	0.179997
3855	0.1615
3860	0.145714
3865	0.132133
3870	0.120365
3875	0.110101
3880	0.101096
3885	0.0931514
3890	0.0861077
3895	0.0798335
3900	0.0742208
3905	0.0691796
3910	0.064635
3915	0.0605239
3920	0.0567928
3925	0
3930	0
3935	0
3940	0
3945	0
3950	0
3955	0
3960	0
3965	0
3970	0
3975	0
3980	0
3985	0
3990	0
3995	0

[truncated: 1 more sheets: SiH4]
