# Supplementary material for: Insights into electric- and thermal-induced decomposition and gas evolution of silicone rubber through experiments and molecular simulations
Source: Royal Society of Chemistry journal article supplement (doi:10.1039/d5ra07405c), 2025-01-01
Supplement: d5ra07405c2.pdf [file d5ra07405c2.pdf]

## Supplementary Information (SI)

### **Insights into Electric- and Thermal-Induced Decomposition and Gas Evolution of Silicone Rubber through Experiments and Molecular Simulations**

Jingwen Gong,<sup>a</sup> Qi Zhao,<sup>b</sup> Jingtao Huang,<sup>\*ac</sup> Zhuocheng Ye,<sup>a</sup> Zihao Wang,<sup>a</sup> Yidong Chen<sup>a</sup> and Wei Gong<sup>\*a</sup>

a. College of Electrical and Engineering, Sichuan University, Chengdu, 610065, Sichuan, China. E-mail: Gwei349@163.com

b. State Grid Sichuan Electric Power Company Leshan Power Supply Company, 614000, China

c. College of Electrical Engineering, Northwest Minzu University, Lanzhou, 730030, China

## **Table of Contents**

1. S1. Details of the electrical decomposition experiments
2. S2. Comparison of Thermal and Electric Decomposition Mechanisms
3. S3. Gas Products from Thermal Decomposition of SiR

## S1. Details of the electrical decomposition experiments

### S1.1 Gas collection

The electrode sheet is clamped between two thin sheets of silicone rubber and placed inside a sealed gas-generating box; the discharge intensity is adjusted by changing the electrode spacing  $d=1, 3$ , or  $5$  mm.

### S1.2 Boost and breakdown voltage

A step-by-step voltage increase (1 kV every 1 min) was employed until a high-energy discharge occurred and triggered material breakdown. The breakdown voltages in air atmosphere were approximately 1.4 kV, 2.0 kV, and 4.8 kV, and in argon atmosphere, they were 1.3 kV, 2.8 kV, and 4.7 kV, respectively.

### S1.3 Discharge duration

The discharge is a single event with a short duration (approximately 0.16 ns) and does not sustain a long-lasting arc.

### S1.4 Energy input

The discharge energy is estimated using  $E = \frac{1}{2}CV_{bd}^2$ . The equivalent capacitance of the device in this paper is in the range of 10-100 pF (typical small fixture/wire range). Calculated using  $C=10$  pF, the discharge energies for 1, 3, and 5 mm electrode spacings are 9.8, 20, and 115.2  $\mu\text{J}$  in air atmosphere, and 8.45, 39.2, and 110.45  $\mu\text{J}$  in argon atmosphere, respectively. Note that the specific value of the equivalent capacitance may vary depending on the device and wiring, and some error may exist. Organize the data into tableS1.

**Table S1.** Estimated discharge energies for different electrode spacings in air and Ar atmospheres ( $C = 10$  pF).

| Electrode spacing (mm) | Atmosphere | Breakdown voltage $V_{bd}$ (kV) | Discharge energy $E = \frac{1}{2}CV_{bd}^2$ ( $\mu\text{J}$ ) |
|------------------------|------------|---------------------------------|---------------------------------------------------------------|
| 1                      | Air        | 1.4                             | 9.8                                                           |
| 1                      | Argon      | 1.3                             | 8.45                                                          |
| 3                      | Air        | 2.0                             | 20.0                                                          |
| 3                      | Argon      | 2.8                             | 39.2                                                          |
| 5                      | Air        | 4.8                             | 115.2                                                         |
| 5                      | Argon      | 4.7                             | 110.45                                                        |

### S1.5 Uncertainty explanation

The breakdown distance may be affected by the electrode placement and the flatness of

the silicone rubber surface. When oblique breakdown occurs, the breakdown distance increases, thus affecting the experimental accuracy.

## S2. Comparison of Thermal and Electric Decomposition Mechanisms

To address the reviewer's comment on the differences in chemical pathways between thermal decomposition and electrical decomposition. Table S2 summarizes the differences in chemical pathways between thermal decomposition and electrical decomposition.

**Table S2.** Comparison of thermal and electrical decomposition of SiR.

|                            | Thermal decomposition                            | Electrical decomposition                                                  |
|----------------------------|--------------------------------------------------|---------------------------------------------------------------------------|
| <b>Reaction mechanism</b>  | Thermally induced chain breakage / rearrangement | Electrothermal coupling chain breakage / free radical generation          |
| <b>Reaction products</b>   | CO <sub>2</sub> 、 CO 、 CH <sub>4</sub> 、 D3 、 D4 | Mainly CH <sub>4</sub> 、 C <sub>2</sub> H <sub>2</sub> 、 SiH <sub>4</sub> |
| <b>Influencing factors</b> | Temperature                                      | Electric field and temperature                                            |

### S3. Gas Products from Thermal Decomposition of SiR

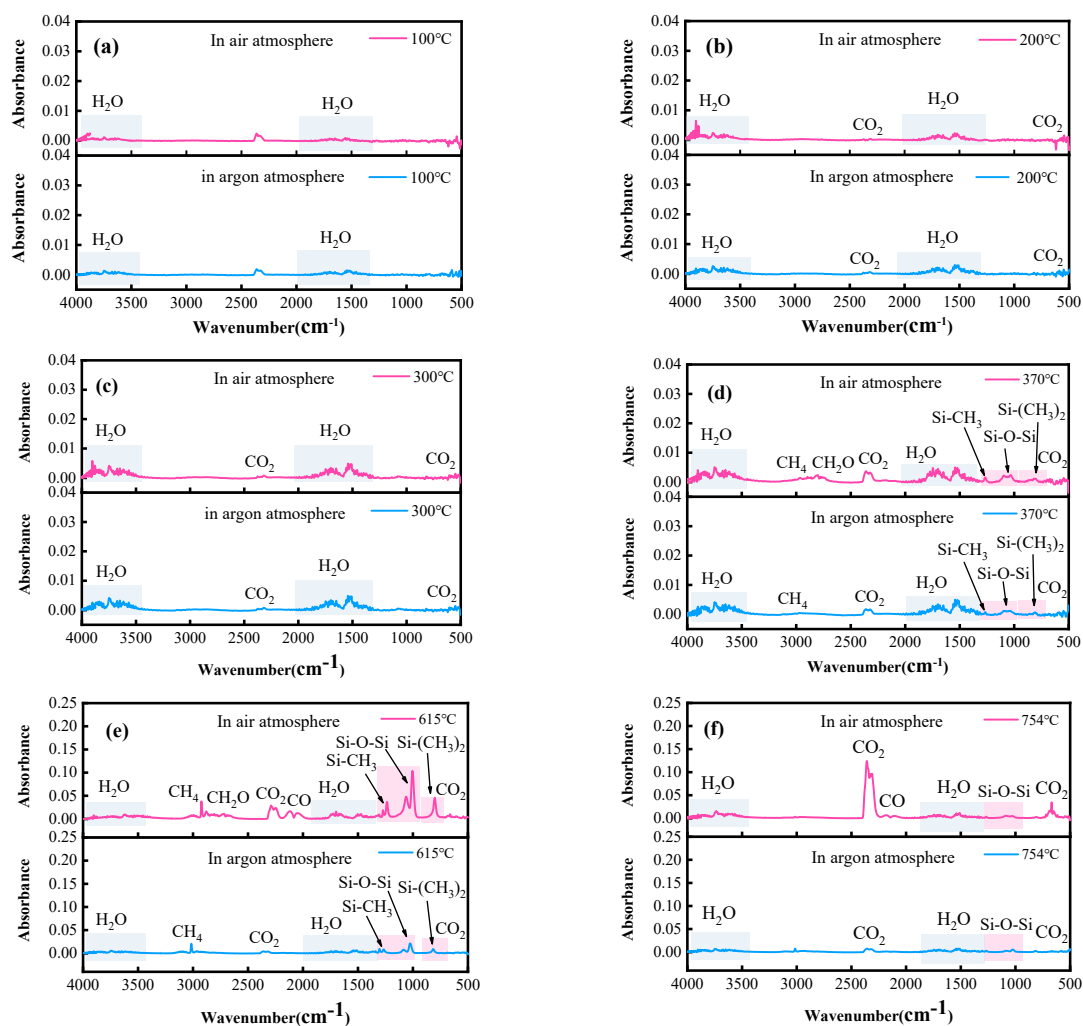

**Fig. S1** IR spectra of the thermal release gases from SiR at (a) 100 °C, (b) 200 °C, (c) 300 °C, (d) 370 °C, (e) 615 °C, and (f) 754 °C in air and argon atmospheres.
